# Supplementary material for: Cross-Validation of Metabolic Phenotypes in SARS-CoV-2 Infected Subpopulations Using Targeted Liquid Chromatography–Mass Spectrometry (LC-MS)
Source: PubMed Central journal article supplement — J Proteome Res. 2024 Mar 14;23(4):1313–27. doi: 10.1021/acs.jproteome.3c00797 (PMC11002931; doi:10.1021/acs.jproteome.3c00797), 2024-03-14

## Supporting Information

### Cross-validation of metabolic phenotypes in SARS-CoV-2 infected sub-populations using targeted liquid chromatography-mass spectrometry (LC-MS)

Luke Whiley<sup>1,2</sup>, Nathan G. Lawler<sup>1,2</sup>, Annie Xu Zeng<sup>1</sup>, Alex Lee<sup>1</sup>, Sung-Tong Chin<sup>1</sup>, Maider Bizkarguenaga<sup>3</sup>, Chiara Bruzzone<sup>3</sup>, Nieves Embade<sup>3</sup>, Julien Wist<sup>1,2,4</sup>, Elaine Holmes<sup>1,2,5</sup>, Oscar Millet<sup>3\*</sup>, Jeremy K. Nicholson<sup>1,2,6\*</sup>, Nicola Gray<sup>1,2\*</sup>

\*Authors to whom correspondence should be addressed

Nicola Gray – [nicola.gray@murdoch.edu.au](mailto:nicola.gray@murdoch.edu.au)

Jeremy K. Nicholson – [Jeremy.nicholson@murdoch.edu.au](mailto:Jeremy.nicholson@murdoch.edu.au)

Oscar Millet – [omillet@cicbiogune.es](mailto:omillet@cicbiogune.es)

<sup>1</sup>Australian National Phenome Centre, Health Futures Institute, Harry Perkins Institute, Murdoch University, 5 Robin Warren Drive, Perth, WA 6150, Australia

<sup>2</sup>Centre for Computational and Systems Medicine, Health Futures Institute, Harry Perkins Institute, Murdoch University, 5 Robin Warren Drive, Perth, WA 6150, Australia

<sup>3</sup>Centro de Investigación Cooperativa en Biociencias—CIC bioGUNE, Precision Medicine and Metabolism Laboratory, Basque Research and Technology Alliance, Bizkaia Science and Technology Park, Building 800, 48160 Derio, Spain

<sup>4</sup>Chemistry Department, Universidad del Valle, Cali 76001, Colombia

<sup>5</sup>Department of Metabolism Digestion and Reproduction, Faculty of Medicine, Imperial College London, Sir Alexander Fleming Building, South Kensington, London SW7 2AZ, UK

<sup>6</sup>Institute of Global Health Innovation, Faculty Building South Kensington Campus, Imperial College London, London SW7 2AZ, UK

## Table of Contents

### Supplementary tables

|                                                                                                                                                                        |            |
|------------------------------------------------------------------------------------------------------------------------------------------------------------------------|------------|
| <b>Table S1.</b> Metabolite feature quality control performance metrics.....                                                                                           | <b>S3</b>  |
| <b>Table S2.</b> Mass spectrometry multiple reaction monitoring (MRM) transition and chromatographic retention time details for the Q300 metabolite array.....         | <b>S9</b>  |
| <b>Table S3.</b> Mass spectrometry multiple reaction monitoring (MRM) transition and chromatographic retention time details for the quantitative bile acid method..... | <b>S13</b> |
| <b>Table S4.</b> Results from univariate statistical analysis.....                                                                                                     | <b>S14</b> |

### Supplementary figures

|                                                                                                                                                                                                                                                                                                                                                                                                                                                                                 |            |
|---------------------------------------------------------------------------------------------------------------------------------------------------------------------------------------------------------------------------------------------------------------------------------------------------------------------------------------------------------------------------------------------------------------------------------------------------------------------------------|------------|
| <b>Figure S1.</b> Principal Component Analysis (PCA). Panel A and B present study samples (white) and replicate quality control (QC) samples (light blue), with clustering of QC samples indicating assay reproducibility. Panels C and D represent PCA of only study samples and are coloured by class: Healthy control (dark blue), SARS-CoV-2 positive (dark orange) and SARS-CoV-2 negative (white). SARS-CoV-2 negative were only available for the Australian cohort..... | <b>S19</b> |
| <b>Figure S2.</b> Boxplot visualizations of the 23 metabolites that returned a Benjamini-Hochberg FDR $q < 0.01$ following univariate testing across both Australian and Spain cohorts.....                                                                                                                                                                                                                                                                                     | <b>S20</b> |

**Table S1. Metabolite feature quality control performance metrics**

| Ref. index | Assay                 | Metabolite                     | Class                  | HMDB ID     | QC %RSD       |                    | % missing values in samples |                    | Failed QC (excluded from analysis) |
|------------|-----------------------|--------------------------------|------------------------|-------------|---------------|--------------------|-----------------------------|--------------------|------------------------------------|
|            |                       |                                |                        |             | Spain (serum) | Australia (plasma) | Spain (serum)               | Australia (plasma) |                                    |
| 1          | Q300 metabolite array | 10z-nonadecenoic acid          | fatty acids            | HMDB0013622 | 29.74         | 28.48              | 0                           | 0                  | FALSE                              |
| 2          | Q300 metabolite array | 2-hydroxy-3-methylbutyric acid | fatty acids            | HMDB0000407 | 29.02         | 8.33               | 2.78                        | 0                  | FALSE                              |
| 3          | Q300 metabolite array | 2-hydroxybutyric acid          | organic acids          | HMDB0000008 | 26.96         | 7.38               | 0                           | 0                  | FALSE                              |
| 4          | Q300 metabolite array | 2-hydroxyglutaric acid         | organic acids          | HMDB0000694 | 25.47         | 19.86              | 0                           | 0                  | FALSE                              |
| 5          | Q300 metabolite array | 2-methyl-butyroylcarnitine     | carnitines             | HMDB0000378 | 25.22         | 12.89              | 0                           | 0                  | FALSE                              |
| 6          | Q300 metabolite array | 2-phenylpropionic acid         | Phenyl-propanoic acids | HMDB0011743 | 13.65         | 9.91               | 0                           | 3.13               | FALSE                              |
| 7          | Q300 metabolite array | 3-hydroxybutyric acid          | organic acids          | HMDB0000357 | 12.24         | 8.53               | 0                           | 0                  | FALSE                              |
| 8          | Q300 metabolite array | 3-hydroxy-isovaleric acid      | fatty acids            | HMDB0000754 | 17.44         | 19.13              | 0                           | 0                  | FALSE                              |
| 9          | Q300 metabolite array | 3-hydroxy-isovalerylcarnitine  | carnitines             | HMDB0062555 | 24.7          | 6.05               | 0                           | 0                  | FALSE                              |
| 10         | Q300 metabolite array | 3-methyl-2-oxovaleric acid     | organic acids          | HMDB0000491 | 18.59         | 19.86              | 0                           | 0                  | FALSE                              |
| 11         | Q300 metabolite array | 3-phenylpropionic acid         | phenylprop anoic acids | HMDB0000764 | 19.36         | 27.07              | 0                           | 0                  | FALSE                              |
| 12         | Q300 metabolite array | 5-aminolevulinic acid          | amino acids            | HMDB0001149 | 18.35         | 17.43              | 0                           | 0                  | FALSE                              |
| 13         | Q300 metabolite array | acetylcarnitine                | carnitines             | HMDB0000201 | 13.5          | 19.77              | 0                           | 0                  | FALSE                              |
| 14         | Q300 metabolite array | acetylglycine                  | amino acids            | HMDB0000532 | 18.51         | 8.73               | 0                           | 0                  | FALSE                              |
| 15         | Q300 metabolite array | aconitic acid                  | organic acids          | HMDB0000072 | 8.26          | 15.35              | 0                           | 0                  | FALSE                              |
| 16         | Q300 metabolite array | alanine                        | amino acids            | HMDB0000161 | 10.23         | 3.23               | 0                           | 0                  | FALSE                              |
| 17         | Q300 metabolite array | alpha-aminobutyric acid        | amino acids            | HMDB0000452 | 16.12         | 6.04               | 0                           | 0                  | FALSE                              |
| 18         | Q300 metabolite array | alpha-linolenic acid           | fatty acids            | HMDB0001388 | 23.21         | 15.6               | 2.78                        | 0                  | FALSE                              |
| 19         | Q300 metabolite array | arachidonic acid               | fatty acids            | HMDB0001043 | 26.63         | 13.17              | 0                           | 0                  | FALSE                              |
| 20         | Q300 metabolite array | arginine                       | amino acids            | HMDB0000517 | 9.88          | 4.27               | 0                           | 0                  | FALSE                              |
| 21         | Q300 metabolite array | asparagine                     | amino acids            | HMDB0000168 | 27.43         | 10.39              | 0                           | 0                  | FALSE                              |

|    |                       |                        |               |             |       |       |       |   |       |
|----|-----------------------|------------------------|---------------|-------------|-------|-------|-------|---|-------|
| 22 | Q300 metabolite array | aspartic acid          | amino acids   | HMDB0000191 | 29.91 | 10.49 | 0     | 0 | FALSE |
| 23 | Q300 metabolite array | azelaic acid           | fatty acids   | HMDB0000784 | 14.38 | 18.17 | 0     | 0 | FALSE |
| 24 | Q300 metabolite array | beta-alanine           | amino acids   | HMDB0000056 | 11.23 | 11.47 | 0     | 0 | FALSE |
| 25 | Q300 metabolite array | butyrylcarnitine       | carnitines    | HMDB0002013 | 28.46 | 9.86  | 0     | 0 | FALSE |
| 26 | Q300 metabolite array | caproic acid           | fatty acids   | HMDB0000535 | 24.72 | 8.56  | 0     | 0 | FALSE |
| 27 | Q300 metabolite array | carnitine              | carnitines    | HMDB0000062 | 11.76 | 3.58  | 0     | 0 | FALSE |
| 28 | Q300 metabolite array | citric acid            | organic acids | HMDB0000094 | 9.99  | 5.9   | 0     | 0 | FALSE |
| 29 | Q300 metabolite array | creatine               | amino acids   | HMDB0000064 | 27.59 | 6.07  | 22.22 | 0 | FALSE |
| 30 | Q300 metabolite array | d-glucose              | carbohydrates | HMDB0000122 | 17.35 | 2.93  | 0     | 0 | FALSE |
| 31 | Q300 metabolite array | dimethylglycine        | amino acids   | HMDB0000092 | 14.68 | 12.13 | 0     | 0 | FALSE |
| 32 | Q300 metabolite array | docosahexaenoic acid   | fatty acids   | HMDB0002183 | 28.86 | 16.5  | 0     | 0 | FALSE |
| 33 | Q300 metabolite array | erythronic acid        | carbohydrates | HMDB0000613 | 21.14 | 5.21  | 0     | 0 | FALSE |
| 34 | Q300 metabolite array | ethylmethylacetic acid | fatty acids   | HMDB0002176 | 22.72 | 17.21 | 0     | 0 | FALSE |
| 35 | Q300 metabolite array | glucaric acid          | carbohydrates | HMDB0000663 | 29.02 | 12.61 | 6.94  | 0 | FALSE |
| 36 | Q300 metabolite array | glutamic acid          | amino acids   | HMDB0000148 | 15.17 | 11.5  | 0     | 0 | FALSE |
| 37 | Q300 metabolite array | glutamine              | amino acids   | HMDB0000641 | 17.9  | 5.54  | 0     | 0 | FALSE |
| 38 | Q300 metabolite array | glutaric acid          | organic acids | HMDB0000661 | 13.96 | 13.07 | 5.56  | 0 | FALSE |
| 39 | Q300 metabolite array | glutaryl carnitine     | carnitines    | HMDB0013130 | 22.12 | 10.13 | 0     | 0 | FALSE |
| 40 | Q300 metabolite array | glyceric acid          | carbohydrates | HMDB0000139 | 19.94 | 3.38  | 0     | 0 | FALSE |
| 41 | Q300 metabolite array | glycine                | amino acids   | HMDB0000123 | 13.07 | 3.66  | 0     | 0 | FALSE |
| 42 | Q300 metabolite array | glycylproline          | amino acids   | HMDB0000721 | 24    | 26.57 | 1.39  | 0 | FALSE |
| 43 | Q300 metabolite array | heptanoic acid         | fatty acids   | HMDB0000666 | 22.16 | 15.46 | 0     | 0 | FALSE |
| 44 | Q300 metabolite array | hexanoylcarnitine      | carnitines    | HMDB0000705 | 22.4  | 8.2   | 0     | 0 | FALSE |

|    |                             |                            |                   |             |       |       |       |       |       |
|----|-----------------------------|----------------------------|-------------------|-------------|-------|-------|-------|-------|-------|
| 45 | Q300<br>metabolite<br>array | hippuric acid              | benzenoids        | HMDB0000714 | 19.09 | 4.71  | 0     | 0     | FALSE |
| 46 | Q300<br>metabolite<br>array | histidine                  | amino<br>acids    | HMDB0000177 | 13.39 | 5.05  | 0     | 0     | FALSE |
| 47 | Q300<br>metabolite<br>array | homoserine                 | amino<br>acids    | HMDB0000719 | 20.8  | 16.4  | 2.78  | 0     | FALSE |
| 48 | Q300<br>metabolite<br>array | indole-3-acetic acid       | indoles           | HMDB0000197 | 22.54 | 27.47 | 0     | 0     | FALSE |
| 49 | Q300<br>metabolite<br>array | indole-3-propionic<br>acid | indoles           | HMDB0002302 | 14.34 | 14.01 | 1.39  | 0     | FALSE |
| 50 | Q300<br>metabolite<br>array | indole-3-pyruvic<br>acid   | indoles           | HMDB0060484 | 27.56 | 10.84 | 0     | 0     | FALSE |
| 51 | Q300<br>metabolite<br>array | isovaleric acid            | fatty acids       | HMDB0000718 | 21.06 | 25.91 | 11.11 | 0     | FALSE |
| 52 | Q300<br>metabolite<br>array | isovalerylcarnitine        | carnitines        | HMDB0000688 | 28.69 | 10.31 | 0     | 0     | FALSE |
| 53 | Q300<br>metabolite<br>array | ketoleucine                | organic<br>acids  | HMDB0000695 | 17.54 | 13.12 | 0     | 0     | FALSE |
| 54 | Q300<br>metabolite<br>array | kynurenine                 | amino<br>acids    | HMDB0000684 | 28.57 | 10.77 | 0     | 0     | FALSE |
| 55 | Q300<br>metabolite<br>array | lactic acid                | organic<br>acids  | HMDB0000190 | 13.94 | 12.79 | 0     | 0     | FALSE |
| 56 | Q300<br>metabolite<br>array | leucine                    | amino<br>acids    | HMDB0000687 | 13.11 | 3.82  | 0     | 0     | FALSE |
| 57 | Q300<br>metabolite<br>array | linoleic acid              | fatty acids       | HMDB0000673 | 17.86 | 11.6  | 0     | 0     | FALSE |
| 58 | Q300<br>metabolite<br>array | linoleyl carnitine         | carnitines        | HMDB0006469 | 16.88 | 8.46  | 0     | 0     | FALSE |
| 59 | Q300<br>metabolite<br>array | lysine                     | amino<br>acids    | HMDB0000182 | 11.92 | 4     | 0     | 0     | FALSE |
| 60 | Q300<br>metabolite<br>array | malic acid                 | organic<br>acids  | HMDB0000156 | 12.69 | 5.96  | 0     | 0     | FALSE |
| 61 | Q300<br>metabolite<br>array | malonylcarnitine           | carnitines        | HMDB0002095 | 17.04 | 16.54 | 0     | 0     | FALSE |
| 62 | Q300<br>metabolite<br>array | methionine                 | amino<br>acids    | HMDB0000696 | 10.79 | 21.43 | 0     | 0     | FALSE |
| 63 | Q300<br>metabolite<br>array | methylmalonic acid         | organic<br>acids  | HMDB0000202 | 22.19 | 15.88 | 0     | 10.94 | FALSE |
| 64 | Q300<br>metabolite<br>array | myristoleic acid           | fatty acids       | HMDB0002000 | 22.39 | 11.85 | 0     | 0     | FALSE |
| 65 | Q300<br>metabolite<br>array | n-acetylaspartic acid      | amino<br>acids    | HMDB0000812 | 13.82 | 21.59 | 0     | 0     | FALSE |
| 66 | Q300<br>metabolite<br>array | n-acetylneuraminic<br>acid | carbohydra<br>tes | HMDB0000230 | 17.33 | 10.93 | 0     | 0     | FALSE |
| 67 | Q300<br>metabolite<br>array | o-adipoylcarnitine         | carnitines        | HMDB0061677 | 29.39 | 14.92 | 0     | 0     | FALSE |

|    |                       |                        |               |             |       |       |      |   |       |
|----|-----------------------|------------------------|---------------|-------------|-------|-------|------|---|-------|
| 68 | Q300 metabolite array | octanoic acid          | fatty acids   | HMDB0000482 | 29.89 | 6.49  | 0    | 0 | FALSE |
| 69 | Q300 metabolite array | octanoylcarnitine      | carnitines    | HMDB0000791 | 14.5  | 11.97 | 6.94 | 0 | FALSE |
| 70 | Q300 metabolite array | oleylcarnitine         | carnitines    | HMDB0005065 | 25.42 | 8.88  | 0    | 0 | FALSE |
| 71 | Q300 metabolite array | ornithine              | amino acids   | HMDB0000214 | 12.46 | 3     | 0    | 0 | FALSE |
| 72 | Q300 metabolite array | oxalic acid            | organic acids | HMDB0002329 | 29.56 | 9.57  | 2.78 | 0 | FALSE |
| 73 | Q300 metabolite array | oxoglutaric acid       | organic acids | HMDB0000208 | 27.91 | 9.58  | 0    | 0 | FALSE |
| 74 | Q300 metabolite array | palmitoylcarnitine     | carnitines    | HMDB0000222 | 21.1  | 12.04 | 1.39 | 0 | FALSE |
| 75 | Q300 metabolite array | phenylacetic acid      | benzenoids    | HMDB0000209 | 16.52 | 11.87 | 0    | 0 | FALSE |
| 76 | Q300 metabolite array | phenylacetylglutamine  | amino acids   | HMDB0006344 | 21.11 | 7.36  | 0    | 0 | FALSE |
| 77 | Q300 metabolite array | phenylalanine          | amino acids   | HMDB0000159 | 21.17 | 17.01 | 0    | 0 | FALSE |
| 78 | Q300 metabolite array | phenylpyruvic acid     | benzenoids    | HMDB0000205 | 22.09 | 6.1   | 0    | 0 | FALSE |
| 79 | Q300 metabolite array | pipecolic acid         | amino acids   | HMDB0000716 | 14.83 | 15.65 | 0    | 0 | FALSE |
| 80 | Q300 metabolite array | proline                | amino acids   | HMDB0000162 | 15.47 | 7.28  | 2.78 | 0 | FALSE |
| 81 | Q300 metabolite array | propionic acid         | fatty acids   | HMDB0000237 | 22.17 | 15.97 | 2.78 | 0 | FALSE |
| 82 | Q300 metabolite array | propionylcarnitine     | carnitines    | HMDB0000824 | 28.92 | 4.75  | 0    | 0 | FALSE |
| 83 | Q300 metabolite array | pyroglutamic acid      | amino acids   | HMDB0000267 | 18.22 | 12.14 | 0    | 0 | FALSE |
| 84 | Q300 metabolite array | pyruvic acid           | organic acids | HMDB0000243 | 16.05 | 7.22  | 0    | 0 | FALSE |
| 85 | Q300 metabolite array | sarcosine              | amino acids   | HMDB0000271 | 17.08 | 17.24 | 0    | 0 | FALSE |
| 86 | Q300 metabolite array | sebacic acid           | fatty acids   | HMDB0000792 | 15.38 | 17.89 | 0    | 0 | FALSE |
| 87 | Q300 metabolite array | serine                 | amino acids   | HMDB0000187 | 16.31 | 4.29  | 0    | 0 | FALSE |
| 88 | Q300 metabolite array | stearoylcarnitine      | carnitines    | HMDB0000848 | 18.67 | 23.16 | 0    | 0 | FALSE |
| 89 | Q300 metabolite array | succinic acid          | organic acids | HMDB0000254 | 13.12 | 10.76 | 0    | 0 | FALSE |
| 90 | Q300 metabolite array | tetradecanoylcarnitine | carnitines    | HMDB0005066 | 26.16 | 6.55  | 0    | 0 | FALSE |

|     |                             |                             |                           |             |        |        |       |       |       |
|-----|-----------------------------|-----------------------------|---------------------------|-------------|--------|--------|-------|-------|-------|
| 91  | Q300<br>metabolite<br>array | threonic acid               | organic<br>acids          | HMDB0000943 | 18.78  | 7.43   | 0     | 0     | FALSE |
| 92  | Q300<br>metabolite<br>array | threonine                   | amino<br>acids            | HMDB0000167 | 17.29  | 5.25   | 0     | 0     | FALSE |
| 93  | Q300<br>metabolite<br>array | tryptophan                  | amino<br>acids            | HMDB0000929 | 17.27  | 11.6   | 0     | 0     | FALSE |
| 94  | Q300<br>metabolite<br>array | tyrosine                    | amino<br>acids            | HMDB0000158 | 15.47  | 4.32   | 0     | 0     | FALSE |
| 95  | Q300<br>metabolite<br>array | valeric acid                | fatty acids               | HMDB0000892 | 22.74  | 13.25  | 1.39  | 0     | FALSE |
| 96  | Q300<br>metabolite<br>array | valine                      | amino<br>acids            | HMDB0000883 | 13.73  | 5.78   | 0     | 0     | FALSE |
| 97  | Q300<br>metabolite<br>array | 1-methylhistidine           | amino acids               | HMDB0000001 | 77.01  | 10.34  | 5.56  | 0     | TRUE  |
| 98  | Q300<br>metabolite<br>array | 2-methylhexanoic<br>acid    | fatty acids               | HMDB0031594 | 88.8   | 45.7   | 0     | 0     | TRUE  |
| 99  | Q300<br>metabolite<br>array | 2-phenylglycine             | amino acids               | HMDB0002210 | 145.41 | 168.79 | 65.28 | 0     | TRUE  |
| 100 | Q300<br>metabolite<br>array | 4-hydroxyproline            | amino acids               | HMDB0000725 | 45.36  | 7.07   | 40.28 | 0     | TRUE  |
| 101 | Q300<br>metabolite<br>array | acetic acid                 | fatty acids               | HMDB0000042 | 46.57  | 27.48  | 0     | 0     | TRUE  |
| 102 | Q300<br>metabolite<br>array | adenosine<br>monophosphate  | nucleosides               | HMDB0000045 | 61.47  | 83.12  | 0     | 0     | TRUE  |
| 103 | Q300<br>metabolite<br>array | butyric acid                | fatty acids               | HMDB0000039 | 51.68  | 89.49  | 1.39  | 26.56 | TRUE  |
| 104 | Q300<br>metabolite<br>array | citrulline                  | amino acids               | HMDB0000904 | 7.04   | 3.66   | 86.11 | 0     | TRUE  |
| 105 | Q300<br>metabolite<br>array | decanoic acid               | fatty acids               | HMDB0000511 | 103.4  | 5.22   | 20.83 | 0     | TRUE  |
| 106 | Q300<br>metabolite<br>array | dodecanoylcarnitine         | carnitines                | HMDB0002250 | 44.69  | 22.81  | 0     | 0     | TRUE  |
| 107 | Q300<br>metabolite<br>array | eicosapentaenoic<br>acid    | fatty acids               | HMDB0001999 | 46.36  | 41.89  | 0     | 0     | TRUE  |
| 108 | Q300<br>metabolite<br>array | fumaric acid                | organic<br>acids          | HMDB0000134 | 41.67  | 63.04  | 0     | 0     | TRUE  |
| 109 | Q300<br>metabolite<br>array | gamma-<br>aminobutyric acid | amino acids               | HMDB0000112 | 61.83  | 44.06  | 76.39 | 0     | TRUE  |
| 110 | Q300<br>metabolite<br>array | homocitrulline              | amino acids               | HMDB0000679 | 84.86  | 47.94  | 4.17  | 0     | TRUE  |
| 111 | Q300<br>metabolite<br>array | hydroxyphenyllactic<br>acid | phenylprop<br>anoic acids | HMDB0000755 | 100.64 | 16.38  | 13.89 | 0     | TRUE  |
| 112 | Q300<br>metabolite<br>array | imidazolepropionic<br>acid  | fatty acids               | HMDB0002271 | 43.01  | 122.64 | 0     | 0     | TRUE  |
| 113 | Q300<br>metabolite<br>array | isoleucine                  | amino acids               | HMDB0000172 | na     | 5.09   | 98.61 | 0     | TRUE  |

|     |                             |                                 |                  |             |       |        |       |      |       |
|-----|-----------------------------|---------------------------------|------------------|-------------|-------|--------|-------|------|-------|
| 114 | Q300<br>metabolite<br>array | maleic acid                     | organic<br>acids | HMDB0000176 | 43.43 | 64.88  | 0     | 6.25 | TRUE  |
| 115 | Q300<br>metabolite<br>array | valerylcarnitine                | carnitines       | HMDB0013128 | 33.67 | 125.08 | 2.78  | 0    | TRUE  |
| 116 | Bile Acid                   | chenodeoxycholic<br>acid        | bile acids       | HMDB0000518 | 1.67  | 3.65   | 0     | 0    | FALSE |
| 117 | Bile Acid                   | cholic acid                     | bile acids       | HMDB0000619 | 3.26  | 1.32   | 6.94  | 0    | FALSE |
| 118 | Bile Acid                   | glycocheno-<br>deoxycholic acid | bile acids       | NA          | 7.52  | 3.7    | 0     | 0    | FALSE |
| 119 | Bile Acid                   | glycocholic acid                | bile acids       | HMDB0000138 | 6.89  | 2.44   | 0     | 0    | FALSE |
| 120 | Bile Acid                   | glycodeoxycholic<br>acid        | bile acids       | NA          | 3.79  | 2.43   | 0     | 0    | FALSE |
| 121 | Bile Acid                   | glycourso-<br>deoxycholic acid  | bile acids       | HMDB0000708 | 3.65  | 0.89   | 0     | 0    | FALSE |
| 122 | Bile Acid                   | taurochenodeoxych-<br>olic acid | bile acids       | HMDB0000951 | 5.72  | 2.82   | 0     | 0    | FALSE |
| 123 | Bile Acid                   | taurocholic acid                | bile acids       | HMDB0000036 | 6.13  | 7.32   | 0     | 0    | FALSE |
| 124 | Bile Acid                   | taurodeoxycholic<br>acid        | bile acids       | HMDB0000896 | 2.93  | 2.83   | 0     | 0    | FALSE |
| 125 | Bile Acid                   | ursodeoxycholic<br>acid         | bile acids       | HMDB0000946 | 7.23  | 6.8    | 1.39  | 0    | FALSE |
| 126 | Bile Acid                   | deoxycholic acid                | bile acids       | HMDB0000626 | 3.36  | 7.85   | 1.39  | 100  | TRUE  |
| 127 | Bile Acid                   | glycolithocholic acid           | bile acids       | HMDB0000698 | 10.84 | 45.26  | 20.83 | 100  | TRUE  |
| 128 | Bile Acid                   | lithocholic acid                | bile acids       | HMDB0000761 | 2.86  | 40.36  | 8.33  | 100  | TRUE  |
| 129 | Bile Acid                   | taurohydrodeoxy-<br>cholic acid | bile acids       | NA          | na    | 5.71   | 100   | 0    | TRUE  |
| 130 | Bile Acid                   | tauroolithocholic acid          | bile acids       | HMDB0000722 | na    | 12.87  | 100   | 0    | TRUE  |



**Table S2.** Mass spectrometry multiple reaction monitoring (MRM) transition and chromatographic retention time details for the Q300 metabolomic array

| Ref. index | Metabolite                     | Class                 | HMDB ID     | Cone (V) | Collision (eV) | Ionization mode | Retention Time (min) | Precursor m/z | Product m/z | Internal Standard              |
|------------|--------------------------------|-----------------------|-------------|----------|----------------|-----------------|----------------------|---------------|-------------|--------------------------------|
| 1          | 10z-nonadecenoic acid          | fatty acids           | HMDB0013622 | 40       | 10             | ES-             | 14.42                | 430.3         | 430.1       | tridecanoic acid-d2            |
| 2          | 2-hydroxy-3-methylbutyric acid | fatty acids           | HMDB0000407 | 40       | 10             | ES-             | 5.39                 | 254           | 235.9       | hippuric acid-d5               |
| 3          | 2-hydroxybutyric acid          | organic acids         | HMDB0000008 | 40       | 20             | ES-             | 4.34                 | 237.8         | 151.8       | propanoic acid-d3              |
| 4          | 2-hydroxyglutaric acid         | organic acids         | HMDB0000694 | 40       | 10             | ES+             | 5.95                 | 419.11        | 400.9       | mandelic acid-d5               |
| 5          | 2-methylbutyryl-carnitine      | carnitines            | HMDB0000378 | 40       | 20             | ES+             | 5.09                 | 381.2         | 220.1       | velarylcarnitine-c5-d3         |
| 6          | 2-phenylpropionic acid         | phenylpropanoic acids | HMDB0011743 | 50       | 18             | ES+             | 7.72                 | 286           | 104.8       | hydrocinnamic acid-d9          |
| 7          | 3-hydroxybutyric acid          | organic acids         | HMDB0000357 | 34       | 17             | ES-             | 3.57                 | 238           | 193.8       | 3-hydroxybutyric acid-d4       |
| 8          | 3-hydroxyisovaleric acid       | fatty acids           | HMDB0000754 | 40       | 10             | ES-             | 4.29                 | 252           | 193.9       | beta-hydroxyisovaleric acid-d8 |
| 9          | 3-hydroxy-isovaleryl-carnitine | carnitines            | HMDB0062555 | 40       | 20             | ES+             | 3.66                 | 397.2         | 220.1       | velarylcarnitine c5-d3         |
| 10         | 3-methyl-2-oxovaleric acid     | organic acids         | HMDB0000491 | 30       | 10             | ES+             | 9.94                 | 401.1         | 247.9       | ketoleucine-d3                 |
| 11         | 3-phenylpropionic acid         | phenylpropanoic acids | HMDB0000764 | 60       | 18             | ES+             | 7.71                 | 286.1         | 90.8        | hydrocinnamic acid-d9          |
| 12         | 5-aminolevulinic acid          | amino acids           | HMDB0001149 | 46       | 25             | ES-             | 3.38                 | 265           | 136.8       | valine-d8                      |
| 13         | acetylcarnitine                | carnitines            | HMDB0000201 | 40       | 10             | ES-             | 2.77                 | 383           | 323         | acetylcarnitine c2-d3          |
| 14         | acetylglycine                  | amino acids           | HMDB0000532 | 50       | 18             | ES-             | 2.86                 | 322           | 126.8       | valine-d8                      |
| 15         | aconitic acid                  | organic acids         | HMDB0000072 | 30       | 18             | ES-             | 6.41                 | 443           | 245.9       | mandelic acid-d5               |
| 16         | alanine                        | amino acids           | HMDB0000161 | 30       | 10             | ES+             | 1.7                  | 225           | 207.9       | alanine-d4                     |
| 17         | alpha-aminobutyric acid        | amino acids           | HMDB0000452 | 46       | 18             | ES-             | 2.65                 | 237           | 136.8       | valine-d8                      |
| 18         | alpha-linolenic acid           | fatty acids           | HMDB0001388 | 40       | 10             | ES-             | 12.31                | 412.2         | 412.1       | tridecanoic acid-d2            |
| 19         | arachidonic acid               | fatty acids           | HMDB0001043 | 40       | 10             | ES-             | 12.63                | 438.2         | 438.1       | tridecanoic acid-d2            |
| 20         | arginine                       | amino acids           | HMDB0000517 | 40       | 12             | ES+             | 0.8                  | 310.2         | 293         | arginine-15n2                  |
| 21         | asparagine                     | amino acids           | HMDB0000168 | 40       | 18             | ES+             | 3.3                  | 403.1         | 194.8       | tyrosine-d4                    |
| 22         | aspartic acid                  | amino acids           | HMDB0000191 | 30       | 11             | ES+             | 4.64                 | 404.1         | 386.9       | aspartic acid-d3               |
| 23         | azelaic acid                   | fatty acids           | HMDB0000784 | 40       | 10             | ES-             | 7.91                 | 459.2         | 288         | hydrocinnamic acid-d9          |
| 24         | beta-alanine                   | amino acids           | HMDB0000056 | 40       | 11             | ES+             | 1.58                 | 225           | 195.9       | alanine-d4                     |
| 25         | butyrylcarnitine               | carnitines            | HMDB0002013 | 40       | 20             | ES+             | 4.35                 | 367.2         | 220.1       | velarylcarnitine c5-d3         |
| 26         | caproic acid                   | fatty acids           | HMDB0000535 | 30       | 25             | ES-             | 7.84                 | 250           | 136.8       | caproic acid-d3                |
| 27         | carnitine                      | carnitines            | HMDB0000062 | 40       | 20             | ES+             | 1.68                 | 297.2         | 238.2       | carnitine-d3                   |
| 28         | citric acid                    | organic acids         | HMDB0000094 | 50       | 32             | ES-             | 7.6                  | 596.1         | 221.9       | citric acid-d4                 |
| 29         | creatine                       | amino acids           | HMDB0000064 | 50       | 18             | ES+             | 1.94                 | 267           | 113.8       | alanine-d4                     |
| 30         | d-glucose                      | carbohydrates         | HMDB0000122 | 40       | 12             | ES-             | 3.43                 | 313.9         | 205.8       | d-glucose-d7                   |
| 31         | dimethylglycine                | amino acids           | HMDB0000092 | 50       | 18             | ES+             | 1.56                 | 239           | 151.8       | serine-d3                      |
| 32         | docosahexaenoic acid           | fatty acids           | HMDB0002183 | 40       | 10             | ES-             | 12.49                | 462.2         | 462.1       | tridecanoic acid-d2            |
| 33         | erythronic acid                | carbohydrates         | HMDB0000613 | 34       | 20             | ES-             | 2.08                 | 270           | 136.8       | tyrosine-d4                    |
| 34         | ethylmethylacetic acid         | fatty acids           | HMDB0002176 | 40       | 10             | ES-             | 6.23                 | 238           | 56.7        | valeric acid-d9                |
| 35         | glucaric acid                  | carbohydrates         | HMDB0000663 | 30       | 10             | ES+             | 5.09                 | 481.1         | 327.9       | tryptophan-d5                  |
| 36         | glutamic acid                  | amino acids           | HMDB0000148 | 40       | 12             | ES+             | 3.32                 | 265           | 114         | tyrosine-d4                    |
| 37         | glutamine                      | amino acids           | HMDB0000641 | 40       | 12             | ES+             | 1.46                 | 282           | 114         | serine-d3                      |

|    |                         |               |             |    |    |     |       |       |       |                            |
|----|-------------------------|---------------|-------------|----|----|-----|-------|-------|-------|----------------------------|
| 38 | glutaric acid           | organic acids | HMDB0000661 | 50 | 12 | ES+ | 6.46  | 403.1 | 249.9 | benzoic acid-d5            |
| 39 | glutaryl carnitine      | carnitines    | HMDB0013130 | 40 | 20 | ES+ | 5.21  | 546.2 | 220.1 | velaryl carnitine c5-d3    |
| 40 | glyceric acid           | carbohydrates | HMDB0000139 | 40 | 18 | ES- | 2.39  | 239.9 | 136.8 | tyrosine-d4                |
| 41 | glycine                 | amino acids   | HMDB0000123 | 30 | 18 | ES- | 1.34  | 209   | 136.8 | glycine-d5                 |
| 42 | glycylproline           | amino acids   | HMDB0000721 | 40 | 18 | ES+ | 2.28  | 308   | 126.8 | tyrosine-d4                |
| 43 | heptanoic acid          | fatty acids   | HMDB0000666 | 40 | 10 | ES- | 9     | 264.1 | 136.8 | caproic acid-d3            |
| 44 | hexanoyl carnitine      | carnitines    | HMDB0000705 | 40 | 20 | ES+ | 6.21  | 395.2 | 220.1 | velaryl carnitine c5-d3    |
| 45 | hippuric acid           | benzenoids    | HMDB0000714 | 30 | 10 | ES+ | 5.74  | 315.1 | 161.8 | hippuric acid-d5           |
| 46 | histidine               | amino acids   | HMDB0000177 | 40 | 12 | ES+ | 0.77  | 291   | 273.9 | histidine-15n3             |
| 47 | homoserine              | amino acids   | HMDB0000719 | 30 | 10 | ES+ | 1.82  | 255   | 237.9 | serine-d3                  |
| 48 | indole-3-acetic acid    | indoles       | HMDB0000197 | 60 | 15 | ES+ | 6.87  | 311   | 129.8 | benzoic acid-d5            |
| 49 | indole-3-propionic acid | indoles       | HMDB0002302 | 30 | 14 | ES+ | 7.33  | 325.1 | 129.8 | hydrocinnamic acid-d9      |
| 50 | indole-3-pyruvic acid   | indoles       | HMDB0060484 | 60 | 15 | ES+ | 7.72  | 339   | 130   | benzoic acid-d5            |
| 51 | isovaleric acid         | fatty acids   | HMDB0000718 | 30 | 18 | ES- | 6.39  | 236   | 136.8 | valeric acid-d9            |
| 52 | isovaleryl carnitine    | carnitines    | HMDB0000688 | 40 | 20 | ES+ | 5.25  | 381.2 | 220.1 | velaryl carnitine c5-d3    |
| 53 | ketoleucine             | organic acids | HMDB0000695 | 30 | 10 | ES+ | 10.05 | 401.1 | 247.9 | ketoleucine-d3             |
| 54 | kynurenine              | amino acids   | HMDB0000684 | 60 | 18 | ES+ | 4.44  | 344.1 | 308.9 | aspartic acid-d3           |
| 55 | lactic acid             | organic acids | HMDB0000190 | 30 | 14 | ES+ | 3.39  | 226   | 164.8 | lactic acid-d3             |
| 56 | leucine                 | amino acids   | HMDB0000687 | 46 | 22 | ES- | 4.25  | 265   | 136.8 | leucine-d3                 |
| 57 | linoleic acid           | fatty acids   | HMDB0000673 | 40 | 10 | ES- | 12.72 | 414.3 | 414.1 | tridecanoic acid-d2        |
| 58 | linoleyl carnitine      | carnitines    | HMDB0006469 | 40 | 20 | ES+ | 11.15 | 559.2 | 220.1 | palmitoyl carnitine c16-d3 |
| 59 | lysine                  | amino acids   | HMDB0000182 | 30 | 10 | ES+ | 0.77  | 282.1 | 83.8  | lysine-d4                  |
| 60 | malic acid              | organic acids | HMDB0000156 | 40 | 20 | ES- | 5.81  | 405.1 | 153.8 | dmalic acid-d3             |
| 61 | malonyl carnitine       | carnitines    | HMDB0002095 | 40 | 20 | ES+ | 4.97  | 518.2 | 220.1 | velaryl carnitine c5-d3    |
| 62 | methionine              | amino acids   | HMDB0000696 | 40 | 23 | ES- | 3.6   | 283   | 136.8 | methionine-d3              |
| 63 | methylmalonic acid      | organic acids | HMDB0000202 | 50 | 14 | ES+ | 6.11  | 389.1 | 235.8 | dmalic acid-d3             |
| 64 | myristoleic acid        | fatty acids   | HMDB0002000 | 50 | 27 | ES- | 11.96 | 360.2 | 136.8 | tridecanoic acid-d2        |
| 65 | n-acetylaspartic acid   | amino acids   | HMDB0000812 | 60 | 12 | ES+ | 5.72  | 446.2 | 292.9 | tryptophan-d5              |
| 66 | n-acetylneuraminic acid | carbohydrates | HMDB0000230 | 46 | 20 | ES- | 2.28  | 443.1 | 221.9 | valine-d8                  |
| 67 | o-adipoyl carnitine     | carnitines    | HMDB0061677 | 40 | 20 | ES+ | 5.57  | 560.2 | 220.1 | velaryl carnitine c5-d3    |
| 68 | octanoic acid           | fatty acids   | HMDB0000482 | 40 | 25 | ES- | 9.91  | 278.1 | 136.8 | nonanoic acid-d3           |
| 69 | octanoyl carnitine      | carnitines    | HMDB0000791 | 40 | 20 | ES+ | 7.87  | 423.3 | 220.1 | octanoyl carnitine c8-d3   |
| 70 | oleyl carnitine         | carnitines    | HMDB0005065 | 40 | 20 | ES+ | 11.53 | 561.2 | 220.1 | palmitoyl carnitine c16-d3 |
| 71 | ornithine               | amino acids   | HMDB0000214 | 40 | 10 | ES+ | 0.75  | 268   | 70    | ornithine-d6               |
| 72 | oxalic acid             | organic acids | HMDB0002329 | 30 | 18 | ES- | 6.59  | 359.1 | 149.8 | adipic acid-d8             |
| 73 | oxoglutaric acid        | organic acids | HMDB0000208 | 50 | 26 | ES- | 9.47  | 550.1 | 232.9 | nonanoic acid-d3           |
| 74 | palmitoyl carnitine     | carnitines    | HMDB0000222 | 40 | 20 | ES+ | 11.34 | 535.2 | 220.1 | palmitoyl carnitine c16-d3 |
| 75 | phenylacetic acid       | benzenoids    | HMDB0000209 | 30 | 23 | ES+ | 6.89  | 272   | 78.8  | benzoic acid-d5            |
| 76 | phenylacetylglutamine   | amino acids   | HMDB0006344 | 30 | 18 | ES- | 5.82  | 398.1 | 279.9 | mandelic acid-d5           |
| 77 | phenylalanine           | amino acids   | HMDB0000159 | 60 | 10 | ES+ | 4.76  | 301.1 | 283.9 | phenylalanine-d8           |
| 78 | phenylpyruvic acid      | benzenoids    | HMDB0000205 | 30 | 10 | ES+ | 10.17 | 435.1 | 281.9 | ketoleucine-d3             |
| 79 | pipecolic acid          | amino acids   | HMDB0000716 | 46 | 20 | ES- | 2.77  | 263.1 | 136.8 | alanine-d4                 |
| 80 | proline                 | amino acids   | HMDB0000162 | 40 | 22 | ES- | 2.34  | 239.9 | 136.8 | tyrosine-d4                |
| 81 | propionic acid          | fatty acids   | HMDB0000237 | 30 | 18 | ES- | 4.41  | 208   | 136.8 | propanoic acid-d3          |
| 82 | propionyl carnitine     | carnitines    | HMDB0000824 | 40 | 20 | ES+ | 3.62  | 353.2 | 220.1 | velaryl carnitine c5-d3    |

|     |                                |                       |                   |    |    |     |       |        |         |                           |
|-----|--------------------------------|-----------------------|-------------------|----|----|-----|-------|--------|---------|---------------------------|
| 83  | pyroglutamic acid              | amino acids           | HMDB0000267       | 46 | 20 | ES- | 3.33  | 263    | 136.8   | valine-d8                 |
| 84  | pyruvic acid                   | organic acids         | HMDB0000243       | 30 | 18 | ES- | 8.34  | 357.4  | 136.8   | citric acid-d4            |
| 85  | sarcosine                      | amino acids           | HMDB0000271       | 50 | 15 | ES+ | 1.5   | 225    | 151.8   | alanine-d4                |
| 86  | sebacic acid                   | fatty acids           | HMDB0000792       | 40 | 10 | ES- | 8.49  | 473.1  | 302     | hydrocinnamic acid-d9     |
| 87  | serine                         | amino acids           | HMDB0000187       | 30 | 10 | ES+ | 1.37  | 241    | 205.9   | serine-d3                 |
| 88  | stearoylcarnitine              | carnitines            | HMDB0000848       | 40 | 20 | ES+ | 11.64 | 559.2  | 220.1   | palmitoylcarnitine c16-d3 |
| 89  | succinic acid                  | organic acids         | HMDB0000254       | 50 | 20 | ES- | 6     | 387    | 233.9   | succinic acid-d4          |
| 90  | tetradecanoylcarnitine         | carnitines            | HMDB0005066       | 40 | 20 | ES+ | 12.26 | 507.2  | 220.1   | palmitoylcarnitine c16-d3 |
| 91  | threonic acid                  | organic acids         | HMDB0000943       | 50 | 20 | ES+ | 2.07  | 272    | 117.8   | tyrosine-d4               |
| 92  | threonine                      | amino acids           | HMDB0000167       | 30 | 50 | ES+ | 1.82  | 255    | 219.9   | alanine-d4                |
| 93  | tryptophan                     | amino acids           | HMDB0000929       | 30 | 20 | ES- | 4.91  | 338    | 208.9   | tryptophan-d5             |
| 94  | tyrosine                       | amino acids           | HMDB0000158       | 50 | 10 | ES+ | 4.16  | 317.1  | 299.9   | tyrosine-d4               |
| 95  | valeric acid                   | fatty acids           | HMDB0000892       | 30 | 18 | ES- | 6.62  | 236    | 136.8   | valeric acid-d9           |
| 96  | valine                         | amino acids           | HMDB0000883       | 50 | 20 | ES- | 3.23  | 251    | 136.8   | valine-d8                 |
| 97  | 1-methylhistidine              | amino acids           | HMDB0000001       | 40 | 12 | ES+ | 1.45  | 305    | 288.1   | histidine-15n3            |
| 98  | 2-methylhexanoic acid          | fatty acids           | HMDB0031594       | 40 | 10 | ES- | 8.5   | 264.1  | 136.8   | caproic acid-d3           |
| 99  | 2-phenylglycine                | amino acids           | HMDB0002210       | 50 | 18 | ES+ | 3.35  | 287.1  | 270     | methionine-d3             |
| 100 | 4-hydroxyproline               | amino acids           | HMDB0000725       | 40 | 22 | ES- | 2.02  | 256    | 136.8   | tyrosine-d4               |
| 101 | acetic acid                    | fatty acids           | HMDB0000042       | 40 | 20 | ES- | 3.52  | 193.9  | 136.8   | acetic acid-d3            |
| 102 | adenosine monophosphate        | nucleosides           | HMDB0000045       | 30 | 18 | ES+ | 2.39  | 483    | 135.9   | tyrosine-d4               |
| 103 | butyric acid                   | fatty acids           | HMDB0000039       | 40 | 10 | ES- | 5.37  | 222    | 136.8   | butyric acid-d3           |
| 104 | citrulline                     | amino acids           | HMDB0000904       | 40 | 15 | ES- | 1.64  | 309    | 265.9   | alanine-d4                |
| 105 | decanoic acid                  | fatty acids           | HMDB0000511       | 50 | 20 | ES- | 11.33 | 306.12 | 136.8   | decanoic acid-d2          |
| 106 | dodecanoylcarnitine            | carnitines            | HMDB0002250       | 40 | 20 | ES+ | 11.13 | 479.3  | 220.1   | palmitoylcarnitine c16-d3 |
| 107 | eicosapentaenoic acid          | fatty acids           | HMDB0001999       | 40 | 10 | ES- | 12.25 | 436.2  | 436.1   | tridecanoic acid-d2       |
| 108 | fumaric acid                   | organic acids         | HMDB0000134       | 40 | 18 | ES+ | 6.8   | 387    | 233.8   | benzoic acid-d5           |
| 109 | gamma-aminobutyric acid        | amino acids           | HMDB0000112       | 40 | 10 | ES- | 1.77  | 330    | 209.8   | alanine-d4                |
| 110 | homocitrulline                 | amino acids           | HMDB0000679       | 30 | 11 | ES+ | 3.13  | 325.1  | 307.9   | alanine-d4                |
| 111 | hydroxyphenyllactic acid       | phenylpropanoic acids | HMDB0000755       | 40 | 22 | ES- | 4.78  | 318.1  | 299.9   | aspartic acid-d3          |
| 112 | imidazolepropionic acid        | fatty acids           | HMDB0002271       | 30 | 18 | ES- | 3.41  | 274    | 136.8   | propanoic acid-d3         |
| 113 | isoleucine                     | amino acids           | HMDB0000172       | 46 | 22 | ES- | 4.09  | 265    | 136.8   | leucine-d3                |
| 114 | maleic acid                    | organic acids         | HMDB0000176       | 40 | 20 | ES- | 6.65  | 385    | 233.9   | adipic acid-d8            |
| 115 | valerylcarnitine               | carnitines            | HMDB0013128       | 40 | 20 | ES+ | 5.25  | 380.2  | 220.1   | valerylcarnitine c5-d3    |
| IS1 | 3-hydroxybutyric acid-d4       | INTERNAL STANDARD     | INTERNAL STANDARD | 30 | 18 | ES- | 3.52  | 242    | 193.8   | NA                        |
| IS2 | benzoic acid-d5                | INTERNAL STANDARD     | INTERNAL STANDARD | 40 | 20 | ES+ | 6.37  | 263.09 | 109.8   | NA                        |
| IS3 | beta-hydroxyisovaleric acid-d8 | INTERNAL STANDARD     | INTERNAL STANDARD | 40 | 10 | ES- | 4.29  | 260.1  | 204.1   | NA                        |
| IS4 | caproic acid-d3                | INTERNAL STANDARD     | INTERNAL STANDARD | 30 | 18 | ES- | 7.82  | 253    | 136.8   | NA                        |
| IS5 | carnitine-d3                   | INTERNAL STANDARD     | INTERNAL STANDARD | 40 | 20 | ES+ | 1.67  | 300.2  | 238.2   | NA                        |
| IS6 | citric acid-d4                 | INTERNAL STANDARD     | INTERNAL STANDARD | 30 | 18 | ES- | 7.71  | 600.1  | 223.9   | NA                        |
| IS7 | d-glucose-d7                   | INTERNAL STANDARD     | INTERNAL STANDARD | 40 | 12 | ES+ | 3.36  | 321.1  | 209.019 | NA                        |
| IS8 | malic acid-d3                  | INTERNAL STANDARD     | INTERNAL STANDARD | 40 | 20 | ES- | 5.81  | 408.1  | 153.8   | NA                        |

|      |                           |                   |                   |    |    |     |       |        |       |    |
|------|---------------------------|-------------------|-------------------|----|----|-----|-------|--------|-------|----|
| IS9  | glycine-d5                | INTERNAL STANDARD | INTERNAL STANDARD | 30 | 18 | ES- | 1.34  | 213    | 196   | NA |
| IS10 | hippuric acid-d5          | INTERNAL STANDARD | INTERNAL STANDARD | 30 | 10 | ES+ | 5.74  | 320    | 167   | NA |
| IS11 | hydrocinnamic acid-d9     | INTERNAL STANDARD | INTERNAL STANDARD | 60 | 18 | ES+ | 7.71  | 295.1  | 100.1 | NA |
| IS12 | ketoleucine-d3            | INTERNAL STANDARD | INTERNAL STANDARD | 30 | 10 | ES+ | 10.05 | 404.1  | 251.1 | NA |
| IS13 | velarylcarnitine c5_d3    | INTERNAL STANDARD | INTERNAL STANDARD | 40 | 20 | ES+ | 5.25  | 384.1  | 224.1 | NA |
| IS14 | acetylcarnitine-d3        | INTERNAL STANDARD | INTERNAL STANDARD | 40 | 10 | ES- | 2.77  | 386    | 326   | NA |
| IS15 | alanine-d4                | INTERNAL STANDARD | INTERNAL STANDARD | 30 | 10 | ES+ | 1.69  | 229    | 212   | NA |
| IS16 | arginine-15n2             | INTERNAL STANDARD | INTERNAL STANDARD | 40 | 12 | ES+ | 0.8   | 312    | 295   | NA |
| IS17 | aspartic acid-d3          | INTERNAL STANDARD | INTERNAL STANDARD | 30 | 11 | ES+ | 4.64  | 407    | 389.8 | NA |
| IS18 | histidine-15n3            | INTERNAL STANDARD | INTERNAL STANDARD | 40 | 12 | ES+ | 0.77  | 294    | 276   | NA |
| IS19 | lactic acid-d3            | INTERNAL STANDARD | INTERNAL STANDARD | 30 | 14 | ES+ | 3.39  | 229    | 168.1 | NA |
| IS20 | leucine-d3                | INTERNAL STANDARD | INTERNAL STANDARD | 46 | 22 | ES- | 4.25  | 268    | 136.8 | NA |
| IS21 | lysine-d4                 | INTERNAL STANDARD | INTERNAL STANDARD | 30 | 10 | ES+ | 0.77  | 286    | 88    | NA |
| IS22 | methionine-d3             | INTERNAL STANDARD | INTERNAL STANDARD | 40 | 23 | ES- | 3.6   | 286    | 140   | NA |
| IS23 | palmitoylcarnitine c16-d3 | INTERNAL STANDARD | INTERNAL STANDARD | 40 | 20 | ES+ | 11.34 | 538.1  | 223.1 | NA |
| IS24 | phenylalanine-d8          | INTERNAL STANDARD | INTERNAL STANDARD | 60 | 10 | ES+ | 4.76  | 309.1  | 292.1 | NA |
| IS25 | serine-d3                 | INTERNAL STANDARD | INTERNAL STANDARD | 30 | 10 | ES+ | 1.36  | 244    | 208.9 | NA |
| IS26 | tryptophan-d5             | INTERNAL STANDARD | INTERNAL STANDARD | 30 | 20 | ES- | 4.91  | 343.1  | 214.1 | NA |
| IS27 | tyrosine-d4               | INTERNAL STANDARD | INTERNAL STANDARD | 50 | 10 | ES+ | 3.34  | 321    | 304   | NA |
| IS28 | valine-d8                 | INTERNAL STANDARD | INTERNAL STANDARD | 50 | 20 | ES- | 3.2   | 259    | 136.8 | NA |
| IS29 | mandelic acid-d5          | INTERNAL STANDARD | INTERNAL STANDARD | 30 | 18 | ES- | 5.86  | 291.14 | 136.8 | NA |
| IS30 | nonanoic acid-d3          | INTERNAL STANDARD | INTERNAL STANDARD | 30 | 18 | ES- | 10.64 | 295.1  | 136.8 | NA |
| IS31 | octanoylcarnitine c8-d3   | INTERNAL STANDARD | INTERNAL STANDARD | 40 | 20 | ES+ | 7.87  | 426.1  | 223.1 | NA |
| IS32 | ornithine-d6              | INTERNAL STANDARD | INTERNAL STANDARD | 40 | 10 | ES+ | 0.75  | 274.1  | 76.1  | NA |
| IS33 | propanoic acid-d3         | INTERNAL STANDARD | INTERNAL STANDARD | 30 | 18 | ES- | 4.41  | 211.1  | 136.8 | NA |
| IS34 | succinic acid-d4          | INTERNAL STANDARD | INTERNAL STANDARD | 30 | 18 | ES- | 6.05  | 391    | 236.9 | NA |
| IS35 | tridecanoic acid-d2       | INTERNAL STANDARD | INTERNAL STANDARD | 30 | 20 | ES- | 12.14 | 350.2  | 136.8 | NA |
| IS36 | valeric acid-d9           | INTERNAL STANDARD | INTERNAL STANDARD | 30 | 18 | ES- | 6.56  | 245    | 136.8 | NA |

**Table S3.** Mass spectrometry multiple reaction monitoring (MRM) transition and chromatographic retention time details for the quantitative bile acid method

| Ref. index | Metabolite                    | Class             | HMDB ID           | Cone (V) | Collision (eV) | Ionization mode | Retention Time (min) | Precursor m/z | Product m/z  | Internal Standard             |
|------------|-------------------------------|-------------------|-------------------|----------|----------------|-----------------|----------------------|---------------|--------------|-------------------------------|
| 116        | chenodeoxycholic acid         | bile acids        | HMDB0000518       | 60       | 16             | ESI-            | 5.67                 | 391.3         | 391.3        | chenodeoxycholic acid-d4      |
| 117        | cholic acid                   | bile acids        | HMDB0000619       | 60       | 20, 34         | ESI-            | 4.79                 | 407.3         | 407.3, 343.3 | cholic acid-d4                |
| 118        | glycochenodeoxycholic acid    | bile acids        | HMDB0000637       | 60       | 20             | ESI-            | 4.78                 | 448.3         | 448.3        | glycochenodeoxycholic acid-d4 |
| 119        | glycocholic acid              | bile acids        | HMDB0000138       | 60       | 20             | ESI-            | 4.13                 | 464.3         | 464.3        | glycocholic acid-d4           |
| 120        | glycodeoxycholic acid         | bile acids        | HMDB0000631       | 60       | 20             | ESI-            | 4.96                 | 448.3         | 448.3        | glycodeoxycholic acid-d4      |
| 121        | glycoursodeoxycholic acid     | bile acids        | HMDB0000708       | 60       | 20             | ESI-            | 3.68                 | 448.3         | 448.3        | glycoursodeoxycholic acid-d4  |
| 122        | taurochenodeoxycholic acid    | bile acids        | HMDB0000951       | 60       | 20, 60         | ESI-            | 4.82                 | 498.3         | 498.3, 80.1  | taurochenodeoxycholic acid-d4 |
| 123        | taurocholic acid              | bile acids        | HMDB0000036       | 60       | 20, 64         | ESI-            | 4.19                 | 514.3         | 514.3, 80.1  | taurocholic acid-d4           |
| 124        | taurodeoxycholic acid         | bile acids        | HMDB0000896       | 60       | 20, 60         | ESI-            | 5.00                 | 498.3         | 498.3, 80.1  | taurodeoxycholic acid-d4      |
| 125        | ursodeoxycholic acid          | bile acids        | HMDB0000946       | 60       | 16             | ESI-            | 4.43                 | 391.3         | 391.3        | ursodeoxycholic acid-d4       |
| 126        | deoxycholic acid              | bile acids        | HMDB0000626       | 60       | 16             | ESI-            | 5.80                 | 391.3         | 391.3        | deoxycholic acid-d4           |
| 127        | glycolithocholic acid         | bile acids        | HMDB0000698       | 60       | 20             | ESI-            | 5.53                 | 432.3         | 432.3        | glycolithocholic acid-d4      |
| 128        | lithocholic acid              | bile acids        | HMDB0000761       | 60       | 32             | ESI-            | 6.56                 | 375.3         | 375.3        | lithocholic acid-d4           |
| 129        | taurohyodeoxycholic acid      | bile acids        | NA                | 60       | 20, 60         | ESI-            | 3.80                 | 498.3         | 498.3, 80.1  | taurohyodeoxycholic acid-d4   |
| 130        | tauroolithocholic acid        | bile acids        | HMDB0000722       | 60       | 20, 60         | ESI-            | 5.60                 | 498.3         | 498.3, 80.1  | tauroolithocholic acid-d4     |
| IS37       | chenodeoxycholic acid-d4      | INTERNAL STANDARD | INTERNAL STANDARD | 60       | 20             | ESI-            | 5.66                 | 395.3         | 395.3        | NA                            |
| IS38       | cholic acid-d4                | INTERNAL STANDARD | INTERNAL STANDARD | 60       | 20, 32         | ESI-            | 4.79                 | 411.3         | 411.3, 347.3 | NA                            |
| IS39       | glycochenodeoxycholic acid-d4 | INTERNAL STANDARD | INTERNAL STANDARD | 60       | 20             | ESI-            | 4.77                 | 452.3         | 452.3        | NA                            |
| IS40       | glycocholic acid-d4           | INTERNAL STANDARD | INTERNAL STANDARD | 60       | 20             | ESI-            | 4.12                 | 468.3         | 468.3        | NA                            |
| IS41       | glycodeoxycholic acid-d4      | INTERNAL STANDARD | INTERNAL STANDARD | 60       | 20             | ESI-            | 4.96                 | 452.3         | 452.3        | NA                            |
| IS42       | glycoursodeoxycholic acid-d4  | INTERNAL STANDARD | INTERNAL STANDARD | 60       | 20             | ESI-            | 3.67                 | 452.3         | 452.3        | NA                            |
| IS43       | taurochenodeoxycholic acid-d4 | INTERNAL STANDARD | INTERNAL STANDARD | 60       | 20, 62         | ESI-            | 4.82                 | 502.3         | 502.3        | NA                            |
| IS44       | taurocholic acid-d4           | INTERNAL STANDARD | INTERNAL STANDARD | 60       | 20, 65         | ESI-            | 4.19                 | 518.3         | 518.3, 80.1  | NA                            |
| IS45       | taurodeoxycholic acid-d4      | INTERNAL STANDARD | INTERNAL STANDARD | 60       | 20, 58         | ESI-            | 4.99                 | 502.3         | 502.3, 80.1  | NA                            |
| IS46       | ursodeoxycholic acid-d4       | INTERNAL STANDARD | INTERNAL STANDARD | 60       | 20             | ESI-            | 4.42                 | 395.3         | 395.3        | NA                            |
| IS47       | deoxycholic acid-d4           | INTERNAL STANDARD | INTERNAL STANDARD | 60       | 20             | ESI-            | 5.80                 | 395.3         | 395.3        | NA                            |
| IS48       | glycolithocholic acid-d4      | INTERNAL STANDARD | INTERNAL STANDARD | 60       | 20             | ESI-            | 5.52                 | 436.3         | 436.3        | NA                            |
| IS49       | lithocholic acid-d4           | INTERNAL STANDARD | INTERNAL STANDARD | 60       | 20             | ESI-            | 6.55                 | 379.3         | 379.3        | NA                            |
| IS50       | tauroolithocholic acid-d4     | INTERNAL STANDARD | INTERNAL STANDARD | 60       | 20, 60         | ESI-            | 5.60                 | 486.3         | 486.3, 80.1  | NA                            |

**Table S4. Results from univariate statistical analysis**

| Ref. index | Metabolite                     | Australia<br>(Kruskal-Wallis (KW) with post-hoc Dunn's test (DT),<br>Three groups: healthy; SARS-CoV-2 neg; SARS-CoV-2 pos) |             |                                      |                                     |                                     |                         |                                  |                                  |                                 | Spain,<br>(Mann-Whitney (MW)),<br>Two groups: healthy; SARS-CoV-2 pos) |             |                                      |                                     |                         |
|------------|--------------------------------|-----------------------------------------------------------------------------------------------------------------------------|-------------|--------------------------------------|-------------------------------------|-------------------------------------|-------------------------|----------------------------------|----------------------------------|---------------------------------|------------------------------------------------------------------------|-------------|--------------------------------------|-------------------------------------|-------------------------|
|            |                                | KW <i>p</i>                                                                                                                 | BH <i>q</i> | Healthy Control Mean Conc. (sd) [μM] | SARS-CoV-2 Pos Mean Conc. (sd) [μM] | SARS-CoV-2 Neg Mean Conc. (sd) [μM] | QC Mean Conc. (sd) [uM] | Healthy Control - SARS-CoV-2 Neg | Healthy Control - SARS-CoV-2 Pos | SARS-CoV-2 Neg - SARS-CoV-2 Pos | MW <i>p</i>                                                            | BH <i>q</i> | Healthy Control Mean Conc. (sd) [μM] | SARS-CoV-2 Pos Mean Conc. (sd) [μM] | QC Mean Conc. (sd) [μM] |
| 1          | 10z-non-adeceanoic acid        | 8.95E-01                                                                                                                    | 9.54E-01    | 0.99 (0.55)                          | 0.9 (0.48)                          | 0.92 (0.63)                         | 0.35 (0.08)             | 4.53E-01                         | 3.67E-01                         | 3.24E-01                        | 1.97E-04                                                               | 8.35E-04    | 0.54 (0.33)                          | 1.09 (0.57)                         | 0.96 (0.23)             |
| 2          | 2-hydroxy-3-methylbutyric acid | 9.64E-01                                                                                                                    | 9.87E-01    | 12.54 (4.3)                          | 11.71 (7.77)                        | 12.67 (12.52)                       | 12.34 (0.84)            | 4.29E-01                         | 4.64E-01                         | 3.96E-01                        | 1.55E-01                                                               | 2.28E-01    | 7.16 (8.22)                          | 10.07 (13.5)                        | 16.5 (4.1)              |
| 3          | 2-hydroxy-butyric acid         | 4.20E-04                                                                                                                    | 2.34E-03    | 68.97 (27.87)                        | 126.98 (39.67)                      | 70.58 (69.3)                        | 48.78 (2.94)            | 3.52E-01                         | 1.52E-04                         | 5.97E-04                        | 6.08E-04                                                               | 2.21E-03    | 62.02 (43.92)                        | 95.12 (78.59)                       | 74.52 (17.2)            |
| 4          | 2-hydroxy-glutaric acid        | 5.31E-03                                                                                                                    | 1.76E-02    | 3.81 (1.29)                          | 4.74 (1.88)                         | 3.85 (2.02)                         | 1.86 (0.3)              | 1.89E-01                         | 8.19E-04                         | 1.11E-02                        | 2.39E-03                                                               | 6.18E-03    | 3.34 (2.31)                          | 5.44 (4.86)                         | 7.89 (1.37)             |
| 5          | 2-methyl-butylcarnitine        | 2.54E-01                                                                                                                    | 4.48E-01    | 0.06 (0.02)                          | 0.06 (0.05)                         | 0.05 (0.04)                         | 0.03 (0)                | 8.13E-02                         | 4.61E-01                         | 7.22E-02                        | 2.55E-01                                                               | 3.38E-01    | 0.07 (0.02)                          | 0.05 (0.06)                         | 0.05 (0.01)             |
| 6          | 2-phenylpropionic acid         | 6.07E-06                                                                                                                    | 9.18E-05    | 0.32 (0.24)                          | 0.01 (0.16)                         | 0.2 (0.22)                          | 0.16 (0.01)             | 3.18E-02                         | 5.71E-07                         | 1.12E-03                        | 5.93E-04                                                               | 2.21E-03    | 0.48 (0.38)                          | 0.14 (0.24)                         | 0.27 (0.03)             |
| 7          | 3-hydroxy-butyric acid         | 7.10E-01                                                                                                                    | 8.32E-01    | 41.14 (76.22)                        | 81.47 (51.96)                       | 61.44 (179.04)                      | 74.1 (5.18)             | 2.21E-01                         | 2.61E-01                         | 4.56E-01                        | 5.13E-02                                                               | 8.91E-02    | 36.16 (154.9)                        | 51.89 (225.47)                      | 138.29 (14.71)          |
| 8          | 3-hydroxy-isovaleric acid      | 1.17E-01                                                                                                                    | 2.63E-01    | 0.35 (0.11)                          | 0.49 (0.34)                         | 0.33 (0.19)                         | 0.44 (0.07)             | 4.94E-01                         | 3.59E-02                         | 3.46E-02                        | 2.25E-01                                                               | 3.10E-01    | 0.32 (0.08)                          | 0.4 (0.22)                          | 0.45 (0.07)             |
| 9          | 3-hydroxy-isovalerylcarnitine  | 5.22E-01                                                                                                                    | 7.19E-01    | 0.03 (0.01)                          | 0.03 (0.06)                         | 0.03 (0.02)                         | 0.02 (0)                | 1.53E-01                         | 4.75E-01                         | 1.75E-01                        | 5.56E-01                                                               | 6.33E-01    | 0.03 (0.01)                          | 0.03 (0.02)                         | 0.03 (0.01)             |
| 10         | 3-methyl-2-oxovaleric acid     | 5.68E-01                                                                                                                    | 7.52E-01    | 130.49 (42.74)                       | 116.22 (50.99)                      | 119.1 (52.66)                       | 60.39 (9.79)            | 1.48E-01                         | 2.46E-01                         | 3.70E-01                        | 8.29E-04                                                               | 2.58E-03    | 2839.1 (1046.92)                     | 1841.94 (856.49)                    | 1248.76 (198.83)        |
| 11         | 3-phenylpropionic acid         | 4.02E-06                                                                                                                    | 8.52E-05    | 1.14 (0.86)                          | 0.06 (0.51)                         | 0.6 (0.74)                          | 0.65 (0.15)             | 1.53E-02                         | 3.25E-07                         | 2.08E-03                        | 6.74E-04                                                               | 2.23E-03    | 0.98 (0.84)                          | 0.32 (0.52)                         | 0.57 (0.1)              |
| 12         | 5-aminolevulinic acid          | 3.26E-04                                                                                                                    | 1.96E-03    | 3.17 (0.63)                          | 4.06 (0.97)                         | 3.03 (0.92)                         | 4.09 (0.58)             | 4.47E-01                         | 1.85E-04                         | 3.01E-04                        | 1.01E-04                                                               | 4.88E-04    | 2.82 (0.74)                          | 3.58 (1.5)                          | 6.27 (0.99)             |
| 13         | acetylcarnitine                | 3.88E-02                                                                                                                    | 9.80E-02    | 14.31 (8.5)                          | 23.02 (23.26)                       | 18.58 (9.28)                        | 8.39 (1.4)              | 3.95E-01                         | 9.57E-03                         | 1.87E-02                        | 7.51E-01                                                               | 8.12E-01    | 16.58 (7.49)                         | 14.04 (9.27)                        | 9.74 (1.13)             |
| 14         | acetyl glycine                 | 6.39E-01                                                                                                                    | 7.78E-01    | 6.34 (2.89)                          | 6.74 (4.38)                         | 6.52 (3.48)                         | 6.19 (0.44)             | 3.01E-01                         | 3.32E-01                         | 1.73E-01                        | 2.30E-01                                                               | 3.12E-01    | 7.51 (4.03)                          | 8.13 (6.02)                         | 8.35 (1.32)             |
| 15         | aconitic acid                  | 2.08E-01                                                                                                                    | 3.88E-01    | 71.89 (21.07)                        | 77.59 (23.06)                       | 64.77 (24.68)                       | 121.49 (15.23)          | 6.92E-02                         | 4.51E-01                         | 5.82E-02                        | 3.35E-01                                                               | 4.28E-01    | 47.75 (19)                           | 56.34 (20.28)                       | 45.01 (3.19)            |
| 16         | alanine                        | 2.54E-02                                                                                                                    | 7.28E-02    | 472.56 (84.93)                       | 495.3 (219.07)                      | 380.9 (105.72)                      | 418.94 (11.05)          | 2.65E-02                         | 2.38E-01                         | 4.65E-03                        | 2.87E-02                                                               | 5.16E-02    | 402.88 (83.53)                       | 458.45 (137.64)                     | 655.66 (57.44)          |
| 17         | alpha-aminobutyric acid        | 3.46E-02                                                                                                                    | 9.16E-02    | 29.56 (6.55)                         | 37.03 (8.48)                        | 25.96 (9.32)                        | 21.76 (1.07)            | 1.84E-01                         | 4.59E-02                         | 5.20E-03                        | 7.61E-02                                                               | 1.22E-01    | 34.64 (10.88)                        | 29.09 (13.93)                       | 27.25 (3.76)            |
| 18         | alpha-linolenic acid           | 4.92E-01                                                                                                                    | 7.04E-01    | 12.16 (8.77)                         | 8.62 (6.91)                         | 11.29 (7.45)                        | 9.59 (1.22)             | 3.70E-01                         | 1.23E-01                         | 2.01E-01                        | 5.47E-02                                                               | 9.36E-02    | 140.78 (118.96)                      | 186.94 (194.08)                     | 666.84 (119.9)          |
| 19         | arachidonic acid               | 1.47E-01                                                                                                                    | 3.06E-01    | 3.86 (1.36)                          | 5.11 (1.8)                          | 4.3 (2.41)                          | 8.14 (0.88)             | 1.88E-01                         | 2.52E-02                         | 1.38E-01                        | 1.25E-09                                                               | 1.89E-08    | 97.62 (33.11)                        | 192.7 (71.19)                       | 440.43 (95.75)          |
| 20         | arginine                       | 3.32E-04                                                                                                                    | 1.96E-03    | 116.81 (27.42)                       | 69.25 (29.95)                       | 93.37 (25.88)                       | 108.48 (3.78)           | 1.01E-02                         | 3.47E-05                         | 4.36E-02                        | 4.48E-01                                                               | 5.45E-01    | 139.36 (32.53)                       | 130.89 (43.95)                      | 377.44 (31.95)          |
| 21         | asparagine                     | 1.17E-03                                                                                                                    | 5.64E-03    | 67.97 (15.64)                        | 51.48 (14.5)                        | 58.78 (17.23)                       | 45.6 (3.87)             | 2.93E-02                         | 1.20E-04                         | 3.38E-02                        | 2.87E-02                                                               | 5.16E-02    | 59.02 (15.7)                         | 69.39 (26.25)                       | 43.76 (10.28)           |

|    |                        |          |          |                |                   |                   |                 |          |          |          |          |          |                      |                     |                    |
|----|------------------------|----------|----------|----------------|-------------------|-------------------|-----------------|----------|----------|----------|----------|----------|----------------------|---------------------|--------------------|
| 22 | aspartic acid          | 5.60E-05 | 5.40E-04 | 5.8 (2.13)     | 9.43 (3.38)       | 7.3 (5.06)        | 14.11 (1.21)    | 7.88E-02 | 6.82E-06 | 1.49E-03 | 5.47E-05 | 3.04E-04 | 21.89 (10.52)        | 37.41 (17.81)       | 72.87 (16.88)      |
| 23 | azelaic acid           | 6.29E-01 | 7.75E-01 | 0.25 (0.09)    | 0.24 (0.1)        | 0.24 (0.15)       | 0.27 (0.04)     | 3.10E-01 | 3.15E-01 | 1.68E-01 | 2.03E-01 | 2.91E-01 | 0.1 (0.08)           | 0.14 (0.05)         | 0.34 (0.04)        |
| 24 | beta-alanine           | 2.58E-01 | 4.48E-01 | 3.34 (3.62)    | 3.74 (1.28)       | 3.25 (1.96)       | 5.16 (0.48)     | 1.95E-01 | 2.10E-01 | 5.00E-02 | 1.26E-03 | 3.72E-03 | 6.44 (2.05)          | 4.51 (2.11)         | 8.23 (0.8)         |
| 25 | butyrylcarnitine       | 3.72E-03 | 1.36E-02 | 0.18 (0.16)    | 0.29 (0.19)       | 0.15 (0.14)       | 0.13 (0.01)     | 4.76E-01 | 1.93E-03 | 1.60E-03 | 5.78E-01 | 6.52E-01 | 0.22 (0.37)          | 0.2 (0.29)          | 0.09 (0.02)        |
| 26 | caproic acid           | 4.98E-01 | 7.04E-01 | 1.16 (0.29)    | 1 (0.39)          | 1.21 (0.34)       | 0.62 (0.04)     | 4.48E-01 | 1.68E-01 | 1.38E-01 | 3.46E-03 | 8.52E-03 | 10.78 (6.42)         | 6.56 (2.95)         | 8.53 (1.81)        |
| 27 | carnitine              | 4.01E-03 | 1.42E-02 | 47.81 (10.61)  | 53.36 (20.84)     | 44.86 (14.68)     | 35.96 (1.05)    | 9.62E-02 | 2.11E-02 | 4.77E-04 | 7.60E-01 | 8.13E-01 | 30.4 (7.1)           | 30.88 (18.54)       | 29.48 (3.03)       |
| 28 | citric acid            | 6.74E-01 | 8.11E-01 | 135.68 (28.33) | 142.51 (43.3)     | 124.14 (34.47)    | 110.36 (5.31)   | 1.95E-01 | 4.14E-01 | 2.67E-01 | 8.65E-01 | 9.08E-01 | 99.76 (27.12)        | 101.12 (35.08)      | 96.2 (8.23)        |
| 29 | creatine               | 7.54E-01 | 8.69E-01 | 40.66 (24.15)  | 42.44 (49.06)     | 45.41 (21.82)     | 61.72 (3.06)    | 4.45E-01 | 2.38E-01 | 2.82E-01 | 4.80E-03 | 1.11E-02 | 31.04 (35.97)        | 59.03 (57.95)       | 59.99 (12.09)      |
| 30 | d-glucose              | 1.84E-04 | 1.30E-03 | 4934.4 (912.2) | 6433.71 (1289.63) | 5069.97 (1377.85) | 4329.36 (103.6) | 2.97E-01 | 5.87E-05 | 4.35E-04 | 9.55E-01 | 9.82E-01 | 3508.96 (1045.74)    | 3299.31 (1971.36)   | 4807.99 (714.38)   |
| 31 | dimethylglycine        | 7.34E-03 | 2.36E-02 | 3.6 (1.92)     | 4.65 (1.97)       | 3.09 (1.34)       | 3.36 (0.33)     | 5.31E-02 | 5.97E-02 | 8.64E-04 | 3.92E-01 | 4.87E-01 | 4.66 (1.78)          | 4.35 (9.26)         | 5.26 (0.66)        |
| 32 | docosahexaenoic acid   | 2.05E-01 | 3.88E-01 | 3.04 (1.52)    | 3.01 (2.19)       | 3.86 (2.58)       | 1.99 (0.27)     | 3.74E-02 | 1.89E-01 | 1.96E-01 | 1.98E-03 | 5.24E-03 | 52.26 (32)           | 78.44 (58.46)       | 81.25 (18.16)      |
| 33 | erythronic acid        | 2.98E-01 | 5.02E-01 | 8 (2.44)       | 10.73 (5.43)      | 6.92 (4.81)       | 5.78 (0.25)     | 4.45E-01 | 9.93E-02 | 7.78E-02 | 5.81E-06 | 3.85E-05 | 10.72 (4.47)         | 4.94 (3.01)         | 4.15 (0.76)        |
| 34 | ethylmethylacetic acid | 1.39E-01 | 3.00E-01 | 1.46 (0.15)    | 1.48 (0.11)       | 1.42 (0.09)       | 1.45 (0.21)     | 4.18E-02 | 4.96E-01 | 4.47E-02 | 9.64E-01 | 9.82E-01 | 1 (0.5)              | 1.01 (0.46)         | 19.65 (3.96)       |
| 35 | glucaric acid          | 5.34E-01 | 7.26E-01 | 0.49 (0.32)    | 0.59 (0.24)       | 0.53 (0.17)       | 1.19 (0.12)     | 2.80E-01 | 1.32E-01 | 2.91E-01 | 9.92E-03 | 2.02E-02 | 0.11 (0.09)          | 0.17 (0.19)         | 0.14 (0.03)        |
| 36 | glutamic acid          | 1.41E-03 | 6.49E-03 | 9.76 (7.99)    | 19.02 (8.93)      | 12.98 (8.17)      | 33.56 (3.15)    | 1.32E-01 | 1.90E-04 | 6.87E-03 | 5.33E-11 | 3.82E-09 | 11.46 (6.31)         | 26.85 (13.3)        | 74.13 (9.63)       |
| 37 | glutamine              | 2.32E-03 | 9.47E-03 | 367.41 (89.23) | 311.36 (50.55)    | 316.07 (55.08)    | 216.2 (9.77)    | 2.24E-03 | 8.33E-04 | 3.55E-01 | 2.27E-02 | 4.23E-02 | 109752.03 (14792.38) | 98053.08 (23220.43) | 46951.44 (7198.67) |
| 38 | glutaric acid          | 3.38E-01 | 5.23E-01 | 0.3 (0.14)     | 0.35 (0.34)       | 0.31 (0.08)       | 0.26 (0.02)     | 3.70E-01 | 1.38E-01 | 7.86E-02 | 8.50E-07 | 6.93E-06 | 0.08 (0.18)          | 0.25 (0.33)         | 0.42 (0.05)        |
| 39 | glutaryl carnitine     | 1.71E-01 | 3.43E-01 | 0.09 (0.02)    | 0.08 (0.04)       | 0.09 (0.02)       | 0.08 (0.01)     | 4.63E-01 | 5.57E-02 | 4.62E-02 | 7.86E-01 | 8.33E-01 | 0.12 (0.06)          | 0.12 (0.2)          | 0.06 (0.01)        |
| 40 | glyceric acid          | 1.47E-04 | 1.20E-03 | 3.86 (0.84)    | 5.15 (1.24)       | 3.85 (1.46)       | 6.57 (0.18)     | 4.94E-01 | 1.19E-04 | 1.27E-04 | 4.89E-01 | 5.83E-01 | 10.93 (4.11)         | 10.46 (5.1)         | 7.88 (1.35)        |
| 41 | glycine                | 9.26E-01 | 9.72E-01 | 244.44 (57.83) | 238.94 (60.32)    | 249.61 (62.72)    | 242.34 (7.24)   | 3.49E-01 | 4.45E-01 | 4.05E-01 | 2.08E-02 | 3.93E-02 | 283.58 (82.58)       | 346.84 (95.74)      | 486.17 (54.43)     |
| 42 | glycylproline          | 6.42E-02 | 1.58E-01 | 0.12 (0.05)    | 0.09 (0.06)       | 0.11 (0.03)       | 0.1 (0.01)      | 3.36E-02 | 1.50E-02 | 3.50E-01 | 7.90E-02 | 1.25E-01 | 0.05 (0.02)          | 0.07 (0.03)         | 0.09 (0.02)        |
| 43 | heptanoic acid         | 3.08E-01 | 5.11E-01 | 1.29 (0.31)    | 1.29 (0.34)       | 1.48 (0.34)       | 0.99 (0.13)     | 6.65E-02 | 1.57E-01 | 3.22E-01 | 1.18E-01 | 1.78E-01 | 1.22 (0.74)          | 0.94 (0.43)         | 2.63 (0.5)         |
| 44 | hexanoylcarnitine      | 8.48E-02 | 2.00E-01 | 0.06 (0.02)    | 0.07 (0.08)       | 0.05 (0.04)       | 0.02 (0)        | 2.80E-01 | 5.63E-02 | 1.56E-02 | 6.92E-01 | 7.68E-01 | 0.09 (0.04)          | 0.09 (0.16)         | 0.03 (0)           |
| 45 | hippuric acid          | 1.60E-04 | 1.21E-03 | 7.11 (8.48)    | 2.2 (4.79)        | 3.85 (3.91)       | 4 (0.15)        | 1.01E-02 | 1.53E-05 | 2.87E-02 | 7.63E-04 | 2.45E-03 | 9.55 (9.68)          | 4.12 (7.41)         | 5.57 (0.91)        |
| 46 | histidine              | 5.25E-06 | 9.18E-05 | 93.68 (19.99)  | 63.12 (15.15)     | 91.56 (12.15)     | 79.38 (3.27)    | 1.70E-01 | 1.37E-06 | 8.62E-05 | 3.95E-01 | 4.87E-01 | 95.28 (13.15)        | 92.7 (24.85)        | 172.19 (19.75)     |

|    |                         |          |          |                    |                    |                    |                    |          |          |          |          |          |                      |                       |                       |
|----|-------------------------|----------|----------|--------------------|--------------------|--------------------|--------------------|----------|----------|----------|----------|----------|----------------------|-----------------------|-----------------------|
| 47 | homoserine              | 7.04E-02 | 1.70E-01 | 11.05<br>(2.85)    | 8.43<br>(3.25)     | 10.94<br>(3.36)    | 9.63<br>(1.29)     | 4.77E-01 | 2.08E-02 | 2.37E-02 | 5.48E-01 | 6.31E-01 | 8.82<br>(3.26)       | 8.51<br>(6.15)        | 11.97<br>(2.13)       |
| 48 | indole-3-acetic acid    | 3.57E-03 | 1.35E-02 | 0.44<br>(0.14)     | 0.28<br>(0.46)     | 0.42<br>(0.19)     | 0.38<br>(0.09)     | 8.30E-02 | 4.11E-04 | 2.31E-02 | 9.95E-01 | 9.95E-01 | 0.52<br>(0.56)       | 0.7 (1.1)             | 0.64<br>(0.12)        |
| 49 | indole-3-propionic acid | 1.09E-05 | 1.45E-04 | 1.84<br>(1.38)     | 0.23<br>(17.33)    | 1.81<br>(1.68)     | 1.14<br>(0.14)     | 4.94E-01 | 1.46E-05 | 1.56E-05 | 1.96E-02 | 3.77E-02 | 1.67<br>(1.21)       | 0.98<br>(1.81)        | 1.44<br>(0.18)        |
| 50 | indole-3-pyruvic acid   | 1.66E-06 | 4.41E-05 | 83.33<br>(22.64)   | 40.1<br>(14.28)    | 73.88<br>(23.17)   | 20.43<br>(1.78)    | 2.85E-01 | 1.01E-06 | 1.34E-05 | 8.99E-04 | 2.72E-03 | 146.58<br>(56.97)    | 101.7<br>(60.15)      | 2.94<br>(0.66)        |
| 51 | isovaleric acid         | 2.81E-01 | 4.81E-01 | 1.47<br>(0.77)     | 1.1 (1)            | 1.03<br>(0.55)     | 0.59<br>(0.11)     | 5.95E-02 | 3.17E-01 | 1.48E-01 | 6.06E-03 | 1.36E-02 | 2.04<br>(0.93)       | 2.56<br>(1.42)        | 31.19<br>(5.82)       |
| 52 | isovalerylcarnitine     | 1.55E-01 | 3.17E-01 | 0.09<br>(0.03)     | 0.1 (0.03)         | 0.08<br>(0.03)     | 0.08<br>(0.01)     | 7.94E-02 | 3.22E-01 | 3.30E-02 | 6.96E-01 | 7.68E-01 | 0.12<br>(0.04)       | 0.12 (0.1)            | 0.1 (0.02)            |
| 53 | ketoleucine             | 1.86E-01 | 3.66E-01 | 109.99<br>(38.96)  | 88.08<br>(29.28)   | 102.56<br>(41.71)  | 71.65<br>(7.68)    | 1.79E-01 | 3.34E-02 | 1.75E-01 | 1.90E-02 | 3.73E-02 | 3487.89<br>(1283.53) | 2781.92<br>(1103.8)   | 1117.9<br>(163.82)    |
| 54 | kynurenine              | 8.79E-03 | 2.74E-02 | 7.44<br>(1.95)     | 10.31<br>(4.1)     | 7.69<br>(3.25)     | 3.38 (0.3)         | 2.91E-01 | 1.80E-03 | 8.81E-03 | 4.79E-01 | 5.77E-01 | 2.44<br>(2.58)       | 2.92<br>(4.01)        | 2.38<br>(0.53)        |
| 55 | lactic acid             | 2.75E-05 | 2.92E-04 | 614.23<br>(136.68) | 960.34<br>(422.92) | 550.57<br>(166.95) | 960.68<br>(100.36) | 2.23E-01 | 1.76E-04 | 7.95E-06 | 1.20E-08 | 1.41E-07 | 817.58<br>(165.75)   | 1319.36<br>(504.51)   | 886.62<br>(105.83)    |
| 56 | leucine                 | 8.84E-01 | 9.54E-01 | 139.78<br>(51.46)  | 140.28<br>(35.07)  | 130.43<br>(47.64)  | 127.66<br>(3.98)   | 4.29E-01 | 3.75E-01 | 3.12E-01 | 6.98E-02 | 1.14E-01 | 147.91<br>(29.52)    | 166.89<br>(44.95)     | 309.3<br>(34.73)      |
| 57 | linoleic acid           | 7.89E-01 | 8.99E-01 | 402.77<br>(216.87) | 337.79<br>(199.34) | 350.24<br>(218.49) | 559.47<br>(52.99)  | 4.58E-01 | 2.94E-01 | 2.59E-01 | 6.47E-04 | 2.21E-03 | 8966.19<br>(3882.71) | 12787.58<br>(7299.95) | 19987.18<br>(3056.95) |
| 58 | linoleyl carnitine      | 8.85E-01 | 9.54E-01 | 0.08<br>(0.03)     | 0.09<br>(0.05)     | 0.08<br>(0.04)     | 0.13<br>(0.01)     | 3.65E-01 | 4.44E-01 | 3.16E-01 | 1.06E-02 | 2.12E-02 | 0.08<br>(0.04)       | 0.11<br>(0.07)        | 0.1 (0.01)            |
| 59 | lysine                  | 6.11E-01 | 7.75E-01 | 252.94<br>(62.83)  | 247.2<br>(52.69)   | 237.12<br>(45.89)  | 216.02<br>(7.05)   | 1.66E-01 | 2.57E-01 | 3.83E-01 | 6.47E-02 | 1.09E-01 | 207.83<br>(33.71)    | 231.88<br>(70.85)     | 342.73<br>(34.98)     |
| 60 | malic acid              | 5.23E-03 | 1.76E-02 | 4.18<br>(1.52)     | 6.32<br>(3.74)     | 3.64 (2.5)         | 4.71<br>(0.23)     | 9.41E-02 | 2.60E-02 | 6.24E-04 | 8.83E-08 | 7.80E-07 | 3.22<br>(1.13)       | 5.75<br>(3.64)        | 4.3 (0.47)            |
| 61 | malonylcarnitine        | 2.58E-01 | 4.48E-01 | 0.25<br>(0.09)     | 0.29<br>(0.39)     | 0.25<br>(0.11)     | 0.16<br>(0.02)     | 4.89E-01 | 7.35E-02 | 7.74E-02 | 5.18E-01 | 6.03E-01 | 0.5 (0.15)           | 0.43<br>(0.29)        | 0.32<br>(0.05)        |
| 62 | methionine              | 5.05E-01 | 7.04E-01 | 27.6<br>(12.08)    | 25.98<br>(9.17)    | 28.23<br>(10.76)   | 41.71<br>(7.3)     | 2.38E-01 | 1.24E-01 | 3.22E-01 | 4.97E-01 | 5.85E-01 | 62.33<br>(11.74)     | 62.3<br>(28.68)       | 98.35<br>(9.09)       |
| 63 | methylmalonic acid      | 5.48E-01 | 7.35E-01 | 6.89<br>(3.86)     | 7.19<br>(4.25)     | 7.36<br>(3.41)     | 2.94<br>(0.31)     | 1.42E-01 | 2.36E-01 | 3.72E-01 | 1.58E-10 | 5.59E-09 | 5.18<br>(2.11)       | 12.36<br>(4.66)       | 9.82<br>(1.87)        |
| 64 | myristoleic acid        | 8.48E-01 | 9.36E-01 | 2.17<br>(2.17)     | 2.96 (4)           | 1.91<br>(2.82)     | 1.33<br>(0.13)     | 4.58E-01 | 3.29E-01 | 2.93E-01 | 3.85E-03 | 9.24E-03 | 3.18<br>(3.55)       | 7.3 (5.31)            | 4.78<br>(0.92)        |
| 65 | n-acetylaspartic acid   | 3.23E-01 | 5.14E-01 | 0.44<br>(0.09)     | 0.45<br>(0.14)     | 0.41<br>(0.21)     | 0.41<br>(0.07)     | 8.73E-02 | 4.60E-01 | 1.10E-01 | 1.50E-03 | 4.19E-03 | 0.53<br>(0.12)       | 0.76<br>(0.45)        | 0.62<br>(0.07)        |
| 66 | n-acetylneuraminic acid | 1.24E-06 | 4.37E-05 | 1.1 (0.17)         | 1.58<br>(0.86)     | 1.1 (0.43)         | 1.05<br>(0.09)     | 4.97E-01 | 2.60E-06 | 2.70E-06 | 4.54E-10 | 9.63E-09 | 0.84<br>(0.22)       | 1.9 (0.91)            | 0.85<br>(0.13)        |
| 67 | o-adipoylcarnitine      | 1.10E-06 | 4.37E-05 | 0.01 (0)           | 0.04<br>(0.05)     | 0.01<br>(0.01)     | 0.01 (0)           | 9.83E-02 | 2.08E-07 | 7.20E-05 | 9.45E-03 | 1.96E-02 | 0.02<br>(0.02)       | 0.03<br>(0.11)        | 0.01 (0)              |
| 68 | octanoic acid           | 3.22E-01 | 5.14E-01 | 5.1 (2.92)         | 4.37<br>(1.42)     | 4.44<br>(1.81)     | 2.59<br>(0.14)     | 2.08E-01 | 6.64E-02 | 2.39E-01 | 7.17E-01 | 7.83E-01 | 38.63<br>(16.94)     | 38.96<br>(19.76)      | 31.75<br>(6.93)       |
| 69 | octanoylcarnitine       | 9.78E-01 | 9.87E-01 | 0.14<br>(0.11)     | 0.13<br>(0.12)     | 0.14 (0.1)         | 0.07<br>(0.01)     | 4.17E-01 | 4.59E-01 | 4.59E-01 | 3.88E-01 | 4.87E-01 | 0.15<br>(0.08)       | 0.13 (0.2)            | 0.05<br>(0.01)        |
| 70 | oleylcarnitine          | 1.21E-02 | 3.68E-02 | 0.21<br>(0.05)     | 0.27<br>(0.15)     | 0.23<br>(0.08)     | 0.13<br>(0.01)     | 2.40E-01 | 2.10E-03 | 1.48E-02 | 1.08E-04 | 4.96E-04 | 0.22<br>(0.11)       | 0.34<br>(0.18)        | 0.12<br>(0.03)        |
| 71 | ornithine               | 9.90E-01 | 9.90E-01 | 83.29<br>(36.73)   | 86.98<br>(19.36)   | 91.62<br>(27.57)   | 82.2<br>(2.02)     | 4.52E-01 | 4.51E-01 | 4.98E-01 | 1.41E-08 | 1.50E-07 | 94.48<br>(20.89)     | 139.85<br>(34.22)     | 95.75<br>(10.22)      |
| 72 | oxalic acid             | 1.20E-01 | 2.65E-01 | 36.4 (8.2)         | 47.74<br>(17.21)   | 38.55<br>(12.77)   | 83.38<br>(6.52)    | 1.30E-01 | 2.00E-02 | 1.70E-01 | 8.42E-03 | 1.78E-02 | 9.61<br>(10.86)      | 4.86 (5.7)            | 9.81<br>(2.12)        |



|     |                        |          |          |                   |                   |                   |                   |          |          |          |          |          |                    |                   |                   |
|-----|------------------------|----------|----------|-------------------|-------------------|-------------------|-------------------|----------|----------|----------|----------|----------|--------------------|-------------------|-------------------|
| 73  | oxoglutaric acid       | 8.26E-07 | 4.37E-05 | 5.15<br>(2.38)    | 15.32<br>(4.85)   | 5.02 (9.7)        | 52.44<br>(4.09)   | 4.01E-01 | 1.08E-06 | 3.53E-06 | 5.69E-10 | 1.00E-08 | 22.61<br>(14.55)   | 52.38<br>(62.12)  | 18.88<br>(4.08)   |
| 74  | palmitoylcarnitine     | 3.12E-02 | 8.49E-02 | 0.14<br>(0.03)    | 0.16<br>(0.06)    | 0.12<br>(0.04)    | 0.11<br>(0.01)    | 4.87E-01 | 1.03E-02 | 1.12E-02 | 1.40E-03 | 4.01E-03 | 0.08<br>(0.03)     | 0.12<br>(0.04)    | 0.07<br>(0.01)    |
| 75  | phenylacetic acid      | 8.27E-01 | 9.33E-01 | 5.46 (3.5)        | 5.04<br>(5.01)    | 5.15<br>(3.06)    | 4.91<br>(0.48)    | 3.43E-01 | 2.74E-01 | 4.18E-01 | 2.20E-04 | 8.99E-04 | 6.62<br>(8.17)     | 19.13<br>(19.93)  | 27.03<br>(3.82)   |
| 76  | phenylacetylglutamine  | 6.18E-01 | 7.75E-01 | 3.69<br>(2.29)    | 3.19<br>(9.85)    | 2.81<br>(3.69)    | 2.15<br>(0.13)    | 2.11E-01 | 4.59E-01 | 1.88E-01 | 3.92E-03 | 9.24E-03 | 3.67<br>(2.77)     | 8.23<br>(8.74)    | 2.41<br>(0.44)    |
| 77  | phenylalanine          | 1.64E-03 | 7.24E-03 | 77.98<br>(21.38)  | 84.71<br>(30.37)  | 71.03<br>(20.98)  | 73.17<br>(10.16)  | 2.15E-02 | 5.58E-02 | 1.81E-04 | 3.88E-08 | 3.74E-07 | 74.98<br>(22.44)   | 121.23<br>(34.84) | 154.78<br>(28.75) |
| 78  | phenylpyruvic acid     | 3.40E-01 | 5.23E-01 | 5.95<br>(1.85)    | 5.39<br>(5.35)    | 5.47<br>(1.63)    | 3.32<br>(0.17)    | 7.59E-02 | 1.64E-01 | 3.37E-01 | 3.21E-01 | 4.15E-01 | 10.84<br>(3.22)    | 12.04<br>(6.65)   | 3.11<br>(0.58)    |
| 79  | pipecolic acid         | 8.97E-02 | 2.07E-01 | 1.55<br>(0.42)    | 1.91<br>(1.58)    | 1.47<br>(0.68)    | 1.09<br>(0.14)    | 4.66E-01 | 2.52E-02 | 3.05E-02 | 6.64E-02 | 1.10E-01 | 2.05<br>(1.31)     | 1.54<br>(0.83)    | 2.68<br>(0.34)    |
| 80  | proline                | 3.29E-03 | 1.29E-02 | 268.33<br>(98.05) | 232.74<br>(74.82) | 214.04<br>(48.33) | 263.69<br>(15.77) | 3.67E-04 | 3.50E-02 | 6.90E-02 | 9.37E-01 | 9.74E-01 | 201.53<br>(84.03)  | 205.68<br>(71.76) | 269.91<br>(36.06) |
| 81  | propionic acid         | 9.64E-01 | 9.87E-01 | 14.44<br>(2.55)   | 13.73<br>(2.47)   | 13.96<br>(3.81)   | 12.76<br>(1.66)   | 4.82E-01 | 4.16E-01 | 3.99E-01 | 8.86E-09 | 1.17E-07 | 6.49<br>(4.08)     | 18.12<br>(7.84)   | 11.19<br>(2.03)   |
| 82  | propionylcarnitine     | 8.21E-04 | 4.33E-03 | 0.7 (0.35)        | 1.08<br>(0.68)    | 0.63<br>(0.41)    | 0.43<br>(0.02)    | 6.81E-02 | 1.09E-02 | 8.86E-05 | 9.77E-01 | 9.87E-01 | 1.35<br>(0.43)     | 1.15<br>(1.25)    | 0.94<br>(0.22)    |
| 83  | pyroglutamic acid      | 1.87E-05 | 2.20E-04 | 16.87<br>(8.23)   | 30.82<br>(11.19)  | 19.88<br>(8.6)    | 38.48<br>(3.81)   | 9.35E-02 | 2.67E-06 | 5.52E-04 | 4.11E-10 | 9.63E-09 | 23.62<br>(7.7)     | 40.47<br>(15)     | 98.7<br>(15.4)    |
| 84  | pyruvic acid           | 9.70E-05 | 8.57E-04 | 112.94<br>(46.59) | 221.69<br>(93.44) | 105.9<br>(42.89)  | 141.34<br>(8.33)  | 1.64E-01 | 7.47E-04 | 1.80E-05 | 2.43E-06 | 1.84E-05 | 51.91<br>(31.8)    | 118.32<br>(69.7)  | 9.34<br>(1.29)    |
| 85  | sarcosine              | 1.83E-03 | 7.76E-03 | 5.62 (2)          | 6.46<br>(1.34)    | 5 (1.22)          | 5.35<br>(0.75)    | 4.67E-03 | 2.00E-01 | 3.63E-04 | 3.28E-04 | 1.29E-03 | 10.33<br>(2.16)    | 12.22<br>(3.82)   | 14.35<br>(2.1)    |
| 86  | sebacic acid           | 7.15E-01 | 8.32E-01 | 0.04<br>(0.03)    | 0.04<br>(0.03)    | 0.04<br>(0.06)    | 0.05<br>(0.01)    | 4.70E-01 | 2.27E-01 | 2.49E-01 | 4.59E-02 | 8.11E-02 | 0.1 (0.02)         | 0.11<br>(0.04)    | 0.13<br>(0.02)    |
| 87  | serine                 | 2.12E-01 | 3.88E-01 | 121.62<br>(29.68) | 106.07<br>(24.49) | 109.46<br>(32.61) | 106.18<br>(3.72)  | 1.58E-01 | 3.97E-02 | 2.19E-01 | 5.74E-05 | 3.04E-04 | 159.96<br>(22.36)  | 188.06<br>(27.61) | 285.12<br>(39.81) |
| 88  | stearoylcarnitine      | 6.20E-01 | 7.75E-01 | 0.05<br>(0.02)    | 0.04<br>(0.02)    | 0.05<br>(0.02)    | 0.03<br>(0.01)    | 2.08E-01 | 1.92E-01 | 4.69E-01 | 6.31E-03 | 1.36E-02 | 0.06<br>(0.02)     | 0.08<br>(0.03)    | 0.04<br>(0.01)    |
| 89  | succinic acid          | 9.00E-01 | 9.54E-01 | 9.57<br>(3.74)    | 10.03<br>(3.65)   | 10.3<br>(2.68)    | 8.68<br>(0.76)    | 3.29E-01 | 3.73E-01 | 4.57E-01 | 7.21E-11 | 3.82E-09 | 10.3<br>(3.54)     | 22.62<br>(9.98)   | 19.26<br>(2.16)   |
| 90  | tetradecanoylcarnitine | 1.44E-01 | 3.04E-01 | 0.04<br>(0.01)    | 0.04<br>(0.03)    | 0.04<br>(0.02)    | 0.02 (0)          | 4.04E-01 | 3.40E-02 | 5.61E-02 | 9.13E-02 | 1.42E-01 | 0.02<br>(0.01)     | 0.02<br>(0.01)    | 0.02 (0)          |
| 91  | threonic acid          | 3.25E-01 | 5.14E-01 | 8.28<br>(2.35)    | 10.59<br>(5.21)   | 7.21<br>(4.37)    | 6.05<br>(0.37)    | 3.98E-01 | 1.22E-01 | 7.84E-02 | 8.90E-06 | 5.55E-05 | 10.86<br>(4.6)     | 5.45<br>(3.14)    | 4.53<br>(0.73)    |
| 92  | threonine              | 3.07E-02 | 8.49E-02 | 102.66<br>(25.15) | 79.11<br>(26.28)  | 106.66<br>(26.72) | 96.61<br>(4.14)   | 2.85E-01 | 5.75E-03 | 2.42E-02 | 9.57E-02 | 1.47E-01 | 103.46<br>(36.9)   | 92.8<br>(34.12)   | 154.25<br>(22.84) |
| 93  | tryptophan             | 2.35E-04 | 1.56E-03 | 151.27<br>(35.11) | 107.71<br>(24.65) | 143.68<br>(33.57) | 106.68<br>(10.1)  | 4.36E-01 | 2.45E-04 | 1.34E-04 | 6.47E-04 | 2.21E-03 | 162.99<br>(26.31)  | 128.91<br>(43.65) | 181.81<br>(26.88) |
| 94  | tyrosine               | 9.77E-01 | 9.87E-01 | 73.78<br>(23.06)  | 76.93<br>(15.32)  | 75.1<br>(18.02)   | 71.43<br>(2.52)   | 4.97E-01 | 4.26E-01 | 4.23E-01 | 1.19E-01 | 1.78E-01 | 68.38<br>(13.34)   | 73.07<br>(21.17)  | 105.43<br>(13.97) |
| 95  | valeric acid           | 6.88E-01 | 8.19E-01 | 5.07<br>(1.01)    | 4.76<br>(1.11)    | 5.44<br>(1.07)    | 3.44<br>(0.34)    | 3.90E-01 | 2.82E-01 | 1.97E-01 | 1.32E-05 | 7.75E-05 | 3.26<br>(2.59)     | 7.14<br>(2.62)    | 3.96<br>(0.61)    |
| 96  | valine                 | 6.01E-01 | 7.75E-01 | 200.39<br>(48.27) | 185.04<br>(34.01) | 182.69<br>(52.37) | 168.96<br>(7.98)  | 1.76E-01 | 2.13E-01 | 4.55E-01 | 2.43E-01 | 3.26E-01 | 241.72<br>(47.07)  | 218.84<br>(53.82) | 308.32<br>(36.24) |
| 116 | chenodeoxycholic acid  | 4.77E-01 | 6.99E-01 | 21.42<br>(194.86) | 28.8<br>(79.18)   | 11.62<br>(72.26)  | 67.57<br>(1.16)   | 1.19E-01 | 3.73E-01 | 2.03E-01 | 8.82E-05 | 4.45E-04 | 150.51<br>(295.93) | 19.84<br>(144.13) | 234.84<br>(1.76)  |
| 117 | cholic acid            | 2.12E-01 | 3.88E-01 | 9.61<br>(166.89)  | 6.39<br>(56.49)   | 6.84<br>(61.09)   | 30.03<br>(0.19)   | 7.36E-02 | 5.71E-02 | 4.34E-01 | 1.40E-04 | 6.18E-04 | 62.62<br>(555.84)  | 11.25<br>(65.92)  | 175.38<br>(2.55)  |

|     |                                  |          |          |                    |                    |                    |                   |          |          |          |          |          |                     |                      |                    |
|-----|----------------------------------|----------|----------|--------------------|--------------------|--------------------|-------------------|----------|----------|----------|----------|----------|---------------------|----------------------|--------------------|
| 118 | glycocheno-<br>deoxycholic acid  | 4.78E-01 | 6.99E-01 | 330.8<br>(310.52)  | 603<br>(597.06)    | 406.46<br>(400.43) | 818.16<br>(14.27) | 3.98E-01 | 1.22E-01 | 1.81E-01 | 2.13E-01 | 2.96E-01 | 275.29<br>(288.07)  | 335.63<br>(419.12)   | 1475.91<br>(49.66) |
| 119 | glycocholic acid                 | 3.65E-02 | 9.43E-02 | 63.12<br>(81.07)   | 197.33<br>(209.57) | 147.96<br>(135.02) | 181.37<br>(2.09)  | 5.76E-02 | 5.47E-03 | 1.57E-01 | 6.31E-03 | 1.36E-02 | 0.23<br>(0.36)      | 0.57<br>(0.68)       | 1.67<br>(0.05)     |
| 120 | glycodeoxycholic<br>acid         | 4.23E-01 | 6.41E-01 | 323.08<br>(290.33) | 537.67<br>(563.32) | 381.85<br>(364.27) | 789.48<br>(9.03)  | 3.58E-01 | 1.01E-01 | 1.78E-01 | 1.74E-01 | 2.52E-01 | 275.11<br>(297.62)  | 339.69<br>(430.43)   | 1482.2<br>(25.15)  |
| 121 | glycourso-<br>deoxycholic acid   | 4.81E-01 | 6.99E-01 | 342.9<br>(330.61)  | 613.54<br>(624.34) | 429.64<br>(402.14) | 869.11<br>(3.65)  | 4.10E-01 | 1.26E-01 | 1.77E-01 | 3.21E-03 | 8.11E-03 | 34.27<br>(41.88)    | 60.09<br>(182.22)    | 148.19<br>(2.42)   |
| 122 | taurocheno--<br>deoxycholic acid | 1.83E-02 | 5.40E-02 | 85.36<br>(144.78)  | 217.32<br>(371.2)  | 143.99<br>(238.09) | 260.14<br>(3.46)  | 7.14E-02 | 2.35E-03 | 8.13E-02 | 2.10E-01 | 2.96E-01 | 37.44<br>(40.15)    | 50.86<br>(132.51)    | 236.67<br>(6.05)   |
| 123 | taurocholic acid                 | 8.58E-04 | 4.33E-03 | 7.82<br>(29.01)    | 50.48<br>(113)     | 25.77<br>(54.24)   | 49.95<br>(1.72)   | 2.32E-02 | 8.73E-05 | 3.52E-02 | 1.90E-03 | 5.17E-03 | 7.96<br>(26.19)     | 26.75<br>(115.29)    | 121.47<br>(3.33)   |
| 124 | taurodeoxycholic<br>acid         | 8.40E-01 | 9.36E-01 | 20.3<br>(36.71)    | 15.17<br>(82.14)   | 39.01<br>(32.53)   | 53.68<br>(0.72)   | 4.44E-01 | 2.85E-01 | 3.33E-01 | 3.03E-06 | 2.14E-05 | 1113.16<br>(1611.9) | 3438.22<br>(8451.83) | 7458.03<br>(97.73) |
| 125 | ursodeoxycholic<br>acid          | 6.26E-01 | 7.75E-01 | 5.66<br>(40.92)    | 8.5<br>(54.38)     | 6.22<br>(7.13)     | 13.59<br>(0.44)   | 3.46E-01 | 2.82E-01 | 1.67E-01 | 2.95E-01 | 3.85E-01 | 16.74<br>(40.55)    | 9.46<br>(94.07)      | 34.02<br>(1.10)    |

**Figure S1.** Principal Component Analysis (PCA). Panel A and B present study samples (white) and replicate quality control (QC) samples (light blue), with clustering of QC samples indicating assay reproducibility. Panels C and D represent PCA of only study samples and are coloured by class: Healthy control (dark blue), SARS-CoV-2 positive (dark orange) and SARS-CoV-2 negative (white). SARS-CoV-2 negative were only available for the Australian cohort.

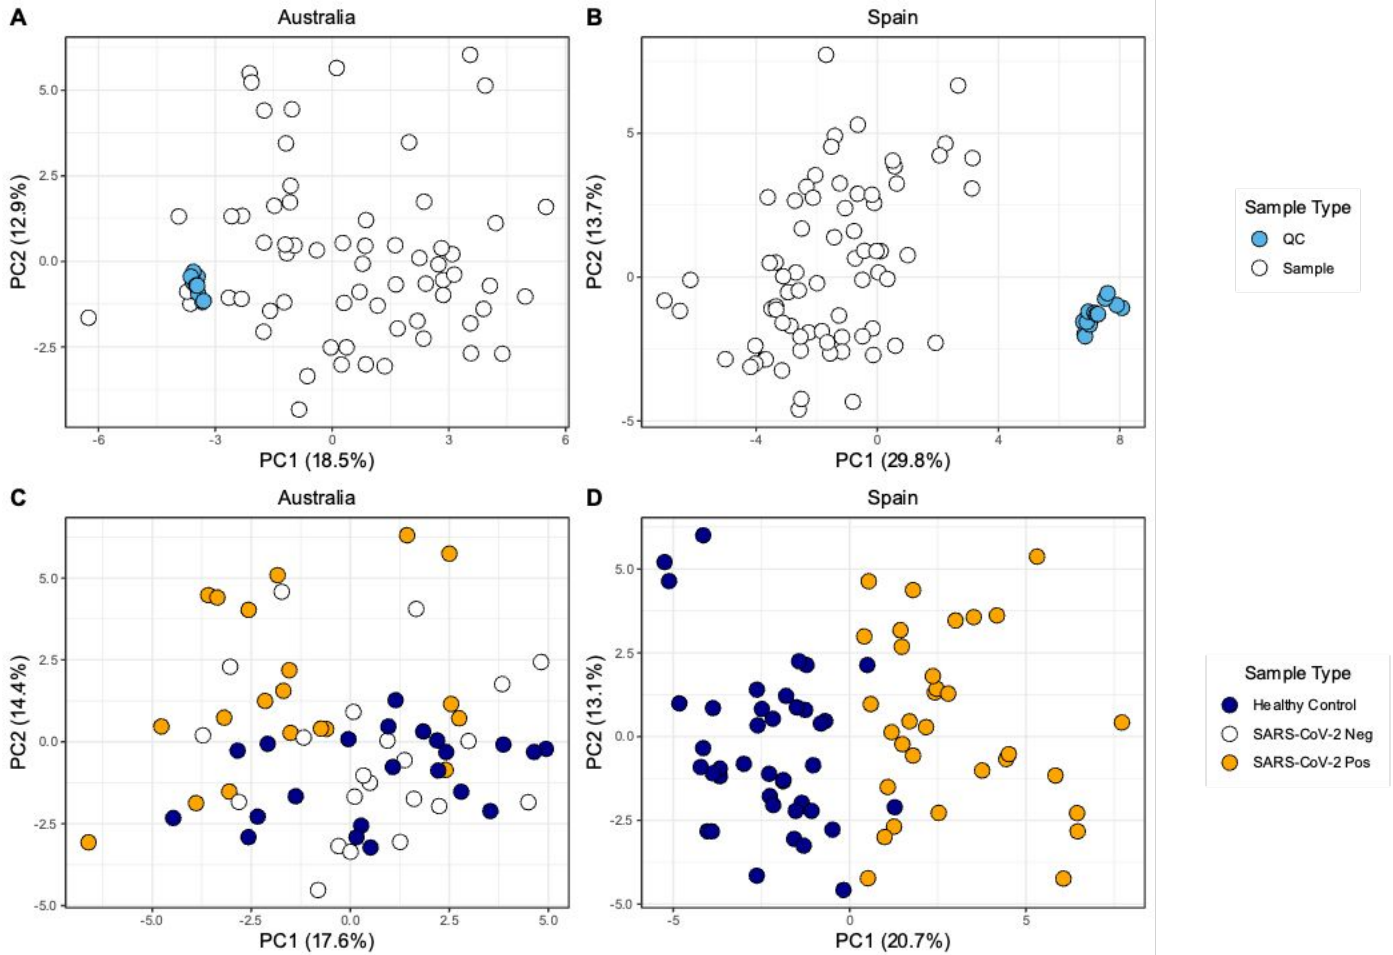

**Figure S2.** Boxplot visualizations of the metabolites (n = 23) that reported an agreement in univariate testing (Benjamini-Hochberg FDR  $q < 0.1$ ) across both the Australian and Spanish cohorts.

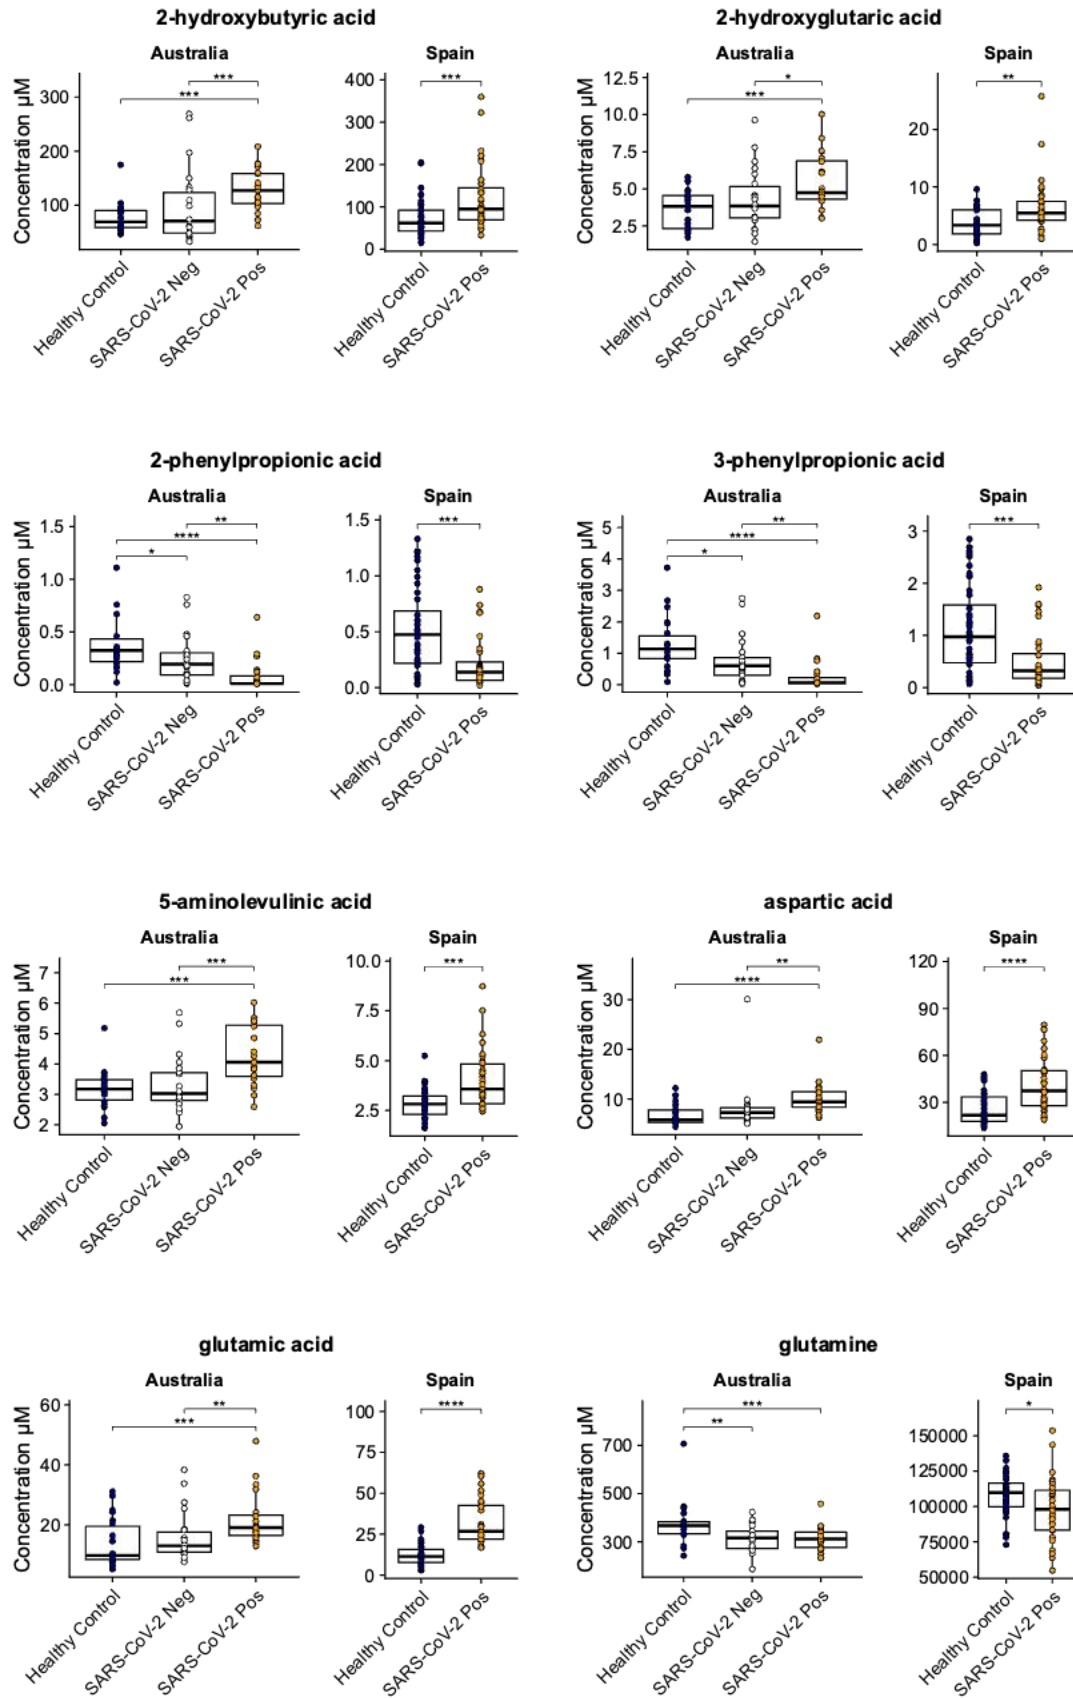

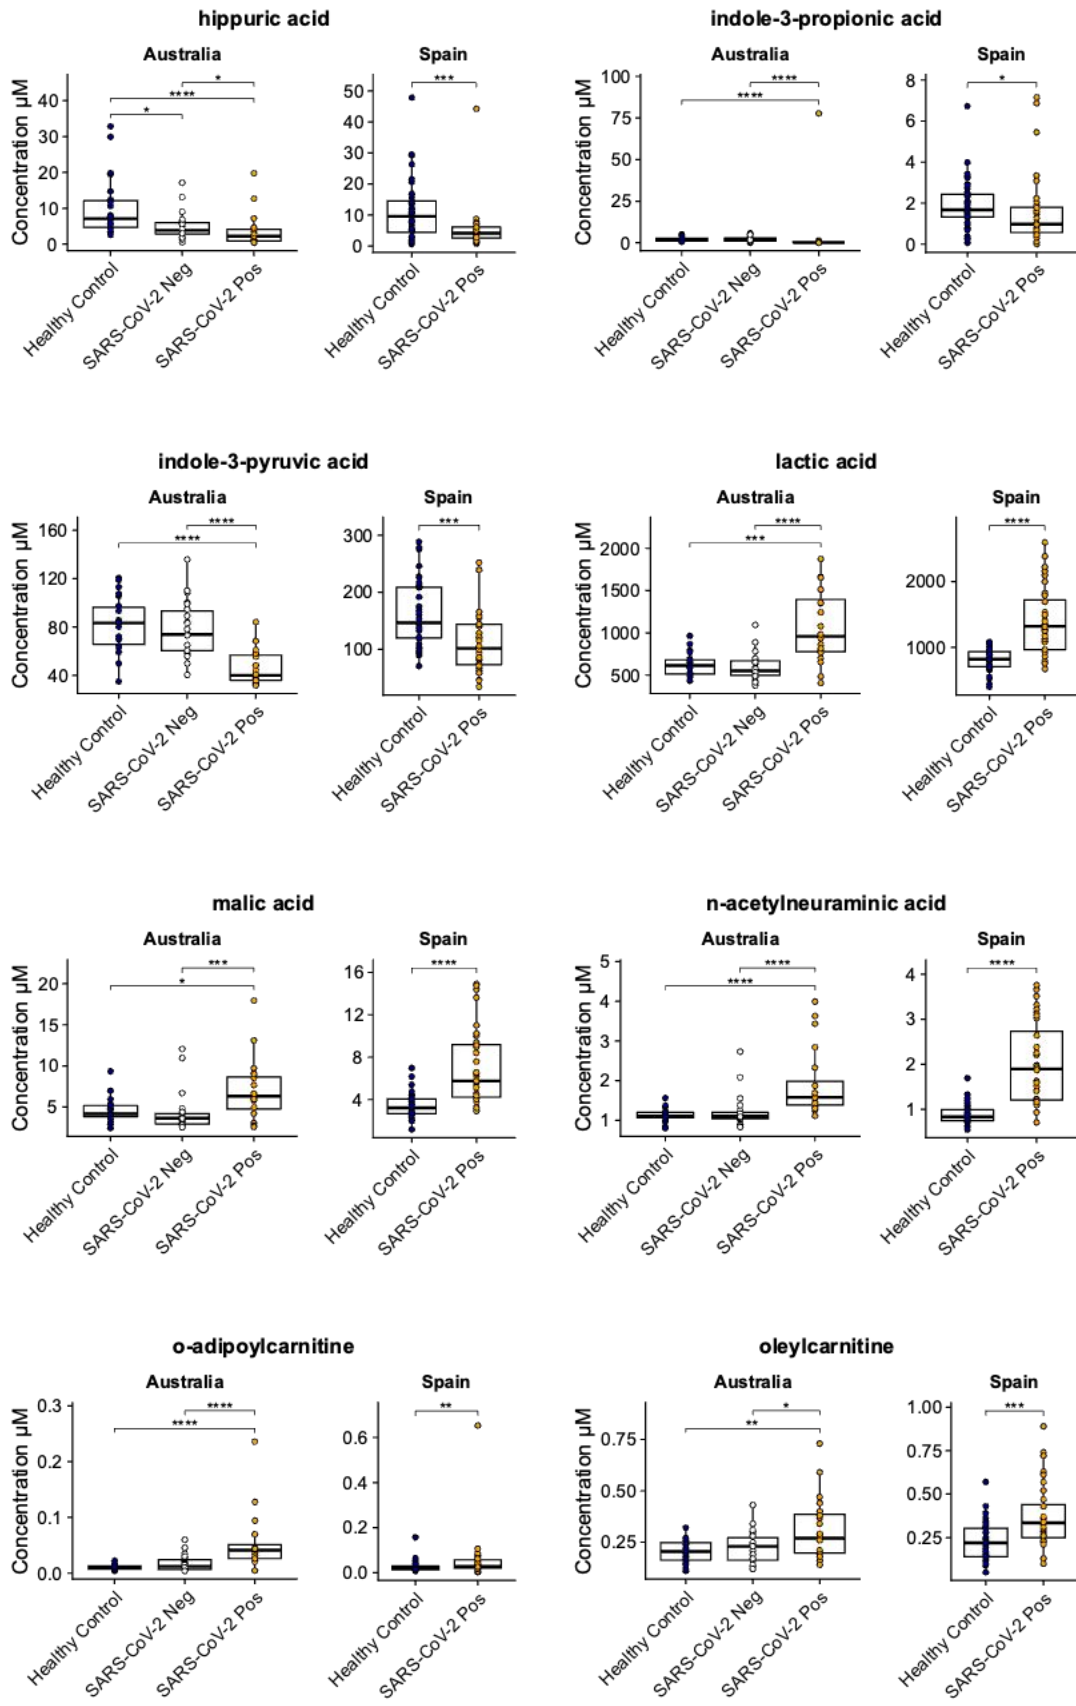

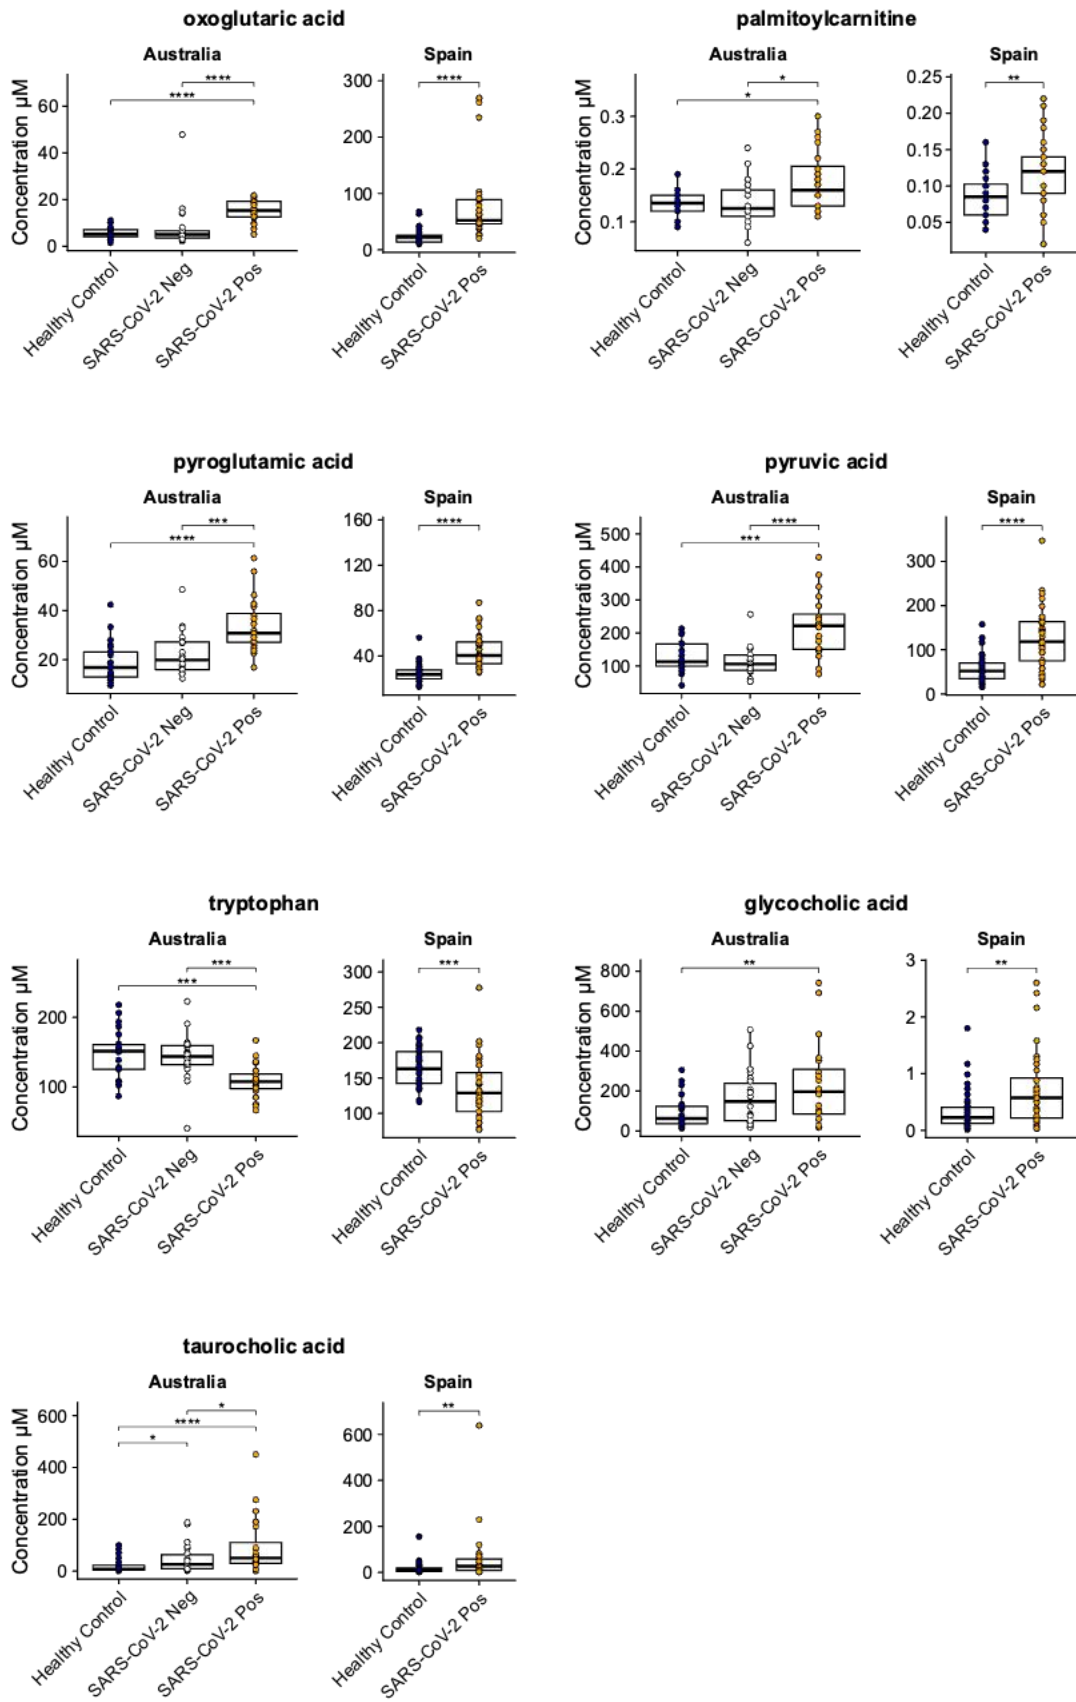

Supplement: pr3c00797_si_001.pdf [file pr3c00797_si_001.pdf]
